# Supplementary material
Source: Royal Society of Chemistry journal article supplement (doi:10.1039/d6cc01288d)
Supplement: d6cc01288d1.pdf [file d6cc01288d1.pdf]

## Supporting Information

### **The first bimetallic Np(V) MOF with $\text{Np}_4\text{Cs}_2\text{O}_8$ structural unit: sorption properties, thermal and radiation stability**

Volkov M.A., Parashutin E.D., Fedoseev A.M., Grigoriev M.S., Novikov A.P., Nevolin I.M.,  
Shiryayev A.A., Averin A.A., Abkhalimov E.V.

Frumkin Institute of Physical Chemistry and Electrochemistry, Russian Academy of Sciences,  
119071 Moscow, Russia; Email: [\\*\\*abkhalimov@ipc.rssi.ru](mailto:**abkhalimov@ipc.rssi.ru)

## Experimental

### Caution!

Neptunium-237 is a radioactive material that poses a significant health risk if inhaled or ingested. It is an alpha emitter and also releases gamma rays from daughter isotopes (e.g., <sup>233</sup>Pa). It must be studied in a facility designed for handling radioactive and toxic heavy metals. All manipulations were performed in a negative pressure radiological glovebox, or in radiochemical fume hoods.

Cesium-137 is extremely  $\gamma$ -radioactive nuclide that poses a significant health risk. All operations must be performed in “hot” cells approved for handling radioactive materials.

### Chemicals

N,N,-dimethylformamide (DMF), nitric acid were purchased from Rushim and 1,2,4,5-tetrakis(4-carboxyphenyl) benzene (H<sub>4</sub>TCPB) was purchased from Macklin. <sup>237</sup>NpO<sub>2</sub> (isotope pure grade) and <sup>137</sup>CsNO<sub>3</sub> aqueous solution (specific activity 500 MBq/mL) was purchased from Isotope JSC. The reagents were used without further purification.

### Synthesis of Cs<sub>2</sub>Np(NO<sub>3</sub>)<sub>6</sub>

100 mg of NpO<sub>2</sub> was fully dissolved in 5 mL of 8 M HNO<sub>3</sub> and 1 mL of H<sub>2</sub>O<sub>2</sub> (30% wt.) was added. Resulting green solution was mixed up with 500  $\mu$ L of saturated solution of CsNO<sub>3</sub> in 8 M HNO<sub>3</sub> and left overnight. Resulting pale-green residue of Cs<sub>2</sub>Np(NO<sub>3</sub>)<sub>6</sub> was removed from mother liquor via decantation and washed with fresh DMF 3 times. Purity of observed material was controlled by pXRD. (Figure S14). Resulting <sup>137</sup>Cs specific activity of the sample was 120 Bq/(mg Cs<sub>2</sub>Np(NO<sub>3</sub>)<sub>6</sub>).

### Synthesis of NpCs-TCPB

2 mg of Cs<sub>2</sub>Np(NO<sub>3</sub>)<sub>6</sub> was mixed up with 2 mg of H<sub>4</sub>TCPB and partially dissolved in 100  $\mu$ L DMF. Resulting suspension was sealed in glass ampoule and heated in oven for 24 hours at 130 °C. Emerald-green crystals, suitable for SCXRD were produced and removed from mother liquor via decantation with washing by fresh DMF 3 times. The <sup>137</sup>Cs-labelled sample possess specific activity of 74 Bq/(mg NpCs-TCPB MOF).

### SCXRD

The single crystal X-ray diffraction experiment was performed on a Bruker KAPPA APEX II diffractometer. The unit-cell parameters were refined over the entire data set simultaneously with data reduction using the SAINT-Plus software.<sup>1</sup> Absorption corrections were applied using the SADABS program.<sup>2</sup> The structure was solved using the SHELXT-2018/2 program<sup>3</sup> and refined

by full-matrix least squares on F2 in the anisotropic approximation for all non-hydrogen atoms in the SHELXL-2018/3 program.<sup>4</sup> The H atoms are located in geometrically calculated positions and refined with isotropic temperature factors equal to 1.2 Ueq(C) for CH and 1.5 Ueq(C) for CH<sub>3</sub>-groups. The solvent molecules are severely disordered; therefore, their contribution to the diffraction intensities was removed using the SQUEEZE routine implemented in PLATON.<sup>5</sup> The structure was subsequently refined using the modified data set. Crystal data, details of data collection, and refinement parameters are summarized in Table S1. The structure has been deposited with the Cambridge Crystallographic Data Centre<sup>6</sup> (CCDC) under deposition number CCDC 2530557.

### **pXRD**

The pXRD study was performed on a Panalytical Aeris diffractometer, equipped with a Cu-K $\alpha$  X-ray source ( $\lambda = 1.54184 \text{ \AA}$ ) and an X'celerator detector, operating under the following conditions: voltage: 40 kV; current: 40 mA; range: 2°–50°; step size: 0.011°.

### **Spectroscopy**

Spectra in visible-near IR range (380-960 nm) were acquired in transmission mode from individual crystals using MSFU-K (LOMO) microspectrophotometer. The aperture size was 30-50  $\mu\text{m}$  depending on the crystal size. Furthermore, the spectrum of the compound in the NaCl matrix was recorded over the range of 400–1300 nm using a Shimadzu UV-3100 UV-vis-NIR spectrophotometer.

IR spectra were collected using iN10 Nicolet microscope in transmission geometry. The aperture size was matching the crystal.

Raman spectra were acquired at inVia Reflex spectrometer (Renishaw) in backscattering geometry using 405 and 633 nm lasers.

### **Sorption and leaching of <sup>137</sup>Cs**

A 2 mg of activated **NpCs-TCPB** MOF was placed in a glass vial and filled with 1 ml of a <sup>137</sup>Cs-spiked 0.001 M CsNO<sub>3</sub> aqueous solution; the specific activity of the solution was 102 Bq/ml. The concentrations of <sup>137</sup>Cs and <sup>237</sup>Np in the leachates solutions were monitored by  $\gamma$ -spectrometry on a GEM30P4–76 spectrometer (Ortec) using an HPGe detector.

### **Radiation Resistance**

Irradiation experiments have been carried out on a linear electron accelerator LINS 3-350. The energy of electron beam was 3 MeV. Dose rate was 180 Gy/s. Absorbed dose was determined using a film dosimeter. The material for irradiation was divided into three equal parts, each

weighing 2 mg. The samples were placed in glass ampoules, purged with argon, evacuated, and sealed.

### **Thermal analysis**

Thermal gravimetry (TG) with simultaneous differential thermal analysis (DTA) was performed using a Netzsch STA Jupiter 449 F3 thermoanalytical complex. The heating rate was set at 10 °C/min, spanning the temperature range from 30 °C to 1000 °C. The experiment utilized Al<sub>2</sub>O<sub>3</sub> crucibles, with the atmosphere composed of a synthetic air. The mass of sample was 1.72 mg.

### **SEM and EDX**

Micrographs of the samples were obtained using a Kyky-EM6900 scanning electron microscope at an accelerating voltage of 20 kV in SE and BSE modes. The elemental composition and distribution maps were obtained using an Energy Dispersive X-ray Spectrometer (EDX).

**Table S1.** Crystal data and structure refinement for **NpCs-TCPB** MOF.

|                                                |                                                                   |
|------------------------------------------------|-------------------------------------------------------------------|
| Identification code                            | <b>NpCs-TCPB</b>                                                  |
| Empirical formula                              | $C_{37}H_{25}Cs_2NNp_2O_{13}$                                     |
| Formula weight                                 | 1431.40                                                           |
| Temperature/K                                  | 100(2)                                                            |
| Crystal system                                 | Triclinic                                                         |
| Space group                                    | P-1                                                               |
| a/Å                                            | 10.732(2)                                                         |
| b/Å                                            | 13.016(3)                                                         |
| c/Å                                            | 16.920(4)                                                         |
| $\alpha/^\circ$                                | 83.593(8)                                                         |
| $\beta/^\circ$                                 | 75.946(8)                                                         |
| $\gamma/^\circ$                                | 88.332(8)                                                         |
| Volume/Å <sup>3</sup>                          | 2278.4(9)                                                         |
| Z                                              | 2                                                                 |
| $\rho_{\text{calc}}/\text{g}/\text{cm}^3$      | 2.086                                                             |
| $\mu/\text{mm}^{-1}$                           | 6.166                                                             |
| F(000)                                         | 1308.0                                                            |
| Crystal size/mm <sup>3</sup>                   | 0.24 × 0.05 × 0.03                                                |
| Radiation                                      | MoK $\alpha$ ( $\lambda = 0.71073$ )                              |
| 2 $\theta$ range for data collection/ $^\circ$ | 7.57 to 54.998                                                    |
| Index ranges                                   | -13 ≤ h ≤ 13, -16 ≤ k ≤ 16, -21 ≤ l ≤ 21                          |
| Reflections collected                          | 34927                                                             |
| Independent reflections                        | 10414 [ $R_{\text{int}} = 0.0619$ , $R_{\text{sigma}} = 0.0724$ ] |
| Data/restraints/parameters                     | 10414/24/498                                                      |
| Goodness-of-fit on F <sup>2</sup>              | 1.026                                                             |
| Final R indexes [ $I \geq 2\sigma(I)$ ]        | $R_1 = 0.0412$ , $wR_2 = 0.0884$                                  |
| Final R indexes [all data]                     | $R_1 = 0.0613$ , $wR_2 = 0.0963$                                  |
| Largest diff. peak/hole / e Å <sup>-3</sup>    | 1.42/-2.50                                                        |

**Table S2. Bond Lengths for NpCs-TCPB.**

| Atom | Atom             | Length/Å    |  | Atom | Atom | Length/Å   |
|------|------------------|-------------|--|------|------|------------|
| Np1  | Np2              | 3.9743 (8)  |  | O10  | C3   | 1.266 (9)  |
| Np1  | Np2 <sup>1</sup> | 3.9954 (7)  |  | O11  | C4   | 1.273 (9)  |
| Np1  | Cs1              | 4.3752 (10) |  | O12  | C4   | 1.259 (8)  |
| Np1  | Cs2 <sup>2</sup> | 4.3091 (10) |  | C1   | C5   | 1.500 (9)  |
| Np1  | O1               | 1.890 (5)   |  | C2   | C11  | 1.498 (9)  |
| Np1  | O2               | 1.829 (6)   |  | C3   | C17  | 1.495 (10) |
| Np1  | O3               | 2.393 (5)   |  | C4   | C23  | 1.482 (9)  |
| Np1  | O7 <sup>3</sup>  | 2.428 (5)   |  | C5   | C6   | 1.387 (10) |
| Np1  | O9 <sup>4</sup>  | 2.497 (5)   |  | C5   | C10  | 1.390 (11) |
| Np1  | O10 <sup>4</sup> | 2.522 (5)   |  | C6   | C7   | 1.388 (9)  |
| Np1  | O12              | 2.434 (5)   |  | C7   | C8   | 1.391 (10) |
| Np1  | C3 <sup>4</sup>  | 2.872 (7)   |  | C8   | C9   | 1.409 (10) |
| Np2  | Cs2              | 3.9915 (9)  |  | C8   | C29  | 1.475 (9)  |
| Np2  | Cs2 <sup>5</sup> | 4.1923 (9)  |  | C9   | C10  | 1.393 (10) |
| Np2  | O1 <sup>1</sup>  | 2.420 (4)   |  | C11  | C12  | 1.394 (10) |
| Np2  | O3               | 1.867 (5)   |  | C11  | C16  | 1.399 (10) |
| Np2  | O4               | 1.821 (5)   |  | C12  | C13  | 1.387 (9)  |
| Np2  | O5 <sup>6</sup>  | 2.572 (5)   |  | C13  | C14  | 1.403 (10) |
| Np2  | O6 <sup>6</sup>  | 2.482 (4)   |  | C14  | C15  | 1.397 (10) |
| Np2  | O8 <sup>3</sup>  | 2.468 (5)   |  | C14  | C31  | 1.489 (9)  |
| Np2  | O11 <sup>1</sup> | 2.397 (5)   |  | C15  | C16  | 1.396 (9)  |
| Np2  | C1 <sup>6</sup>  | 2.869 (7)   |  | C17  | C18  | 1.381 (10) |
| Cs1  | Cs2 <sup>2</sup> | 5.1177 (12) |  | C17  | C22  | 1.384 (11) |
| Cs1  | O3               | 3.058 (5)   |  | C18  | C19  | 1.403 (10) |
| Cs1  | O6 <sup>6</sup>  | 3.516 (5)   |  | C19  | C20  | 1.383 (10) |
| Cs1  | O7 <sup>7</sup>  | 3.367 (5)   |  | C20  | C21  | 1.402 (10) |
| Cs1  | O10 <sup>4</sup> | 3.078 (5)   |  | C20  | C32  | 1.485 (9)  |
| Cs1  | O11 <sup>1</sup> | 3.523 (5)   |  | C21  | C22  | 1.384 (10) |
| Cs1  | C2 <sup>7</sup>  | 3.702 (7)   |  | C23  | C24  | 1.411 (10) |
| Cs1  | C11 <sup>7</sup> | 3.621 (7)   |  | C23  | C28  | 1.403 (10) |
| Cs1  | C12 <sup>7</sup> | 3.643 (8)   |  | C24  | C25  | 1.394 (10) |
| Cs1  | O13              | 3.126 (7)   |  | C25  | C26  | 1.391 (10) |
| Cs2  | O1 <sup>8</sup>  | 3.157 (5)   |  | C26  | C27  | 1.392 (10) |
| Cs2  | O4 <sup>5</sup>  | 3.152 (5)   |  | C26  | C34  | 1.492 (9)  |
| Cs2  | O4               | 3.124 (5)   |  | C27  | C28  | 1.395 (9)  |
| Cs2  | O5 <sup>6</sup>  | 3.236 (5)   |  | C29  | C30  | 1.406 (9)  |
| Cs2  | O8 <sup>3</sup>  | 3.128 (5)   |  | C29  | C34  | 1.416 (10) |
| Cs2  | O9 <sup>9</sup>  | 3.168 (6)   |  | C30  | C31  | 1.404 (10) |
| Cs2  | C3 <sup>9</sup>  | 3.518 (8)   |  | C31  | C32  | 1.410 (10) |
| Cs2  | O13 <sup>8</sup> | 3.060 (7)   |  | C32  | C33  | 1.408 (9)  |
| Cs2  | C35 <sup>8</sup> | 3.832 (11)  |  | C33  | C34  | 1.388 (10) |
| O5   | C1               | 1.254 (8)   |  | O13  | C35  | 1.264 (12) |
| O6   | C1               | 1.273 (9)   |  | N1   | C35  | 1.373 (12) |
| O7   | C2               | 1.275 (9)   |  | N1   | C36  | 1.424 (14) |
| O8   | C2               | 1.263 (8)   |  | N1   | C37  | 1.440 (13) |
| O9   | C3               | 1.277 (8)   |  |      |      |            |

<sup>1</sup>1-X,2-Y,-Z; <sup>2</sup>-1+X,+Y,+Z; <sup>3</sup>1-X,1-Y,1-Z; <sup>4</sup>+X,+Y,-1+Z; <sup>5</sup>2-X,2-Y,-Z; <sup>6</sup>1-X,1-Y,-Z; <sup>7</sup>+X,1+Y,-1+Z; <sup>8</sup>1+X,+Y,+Z; <sup>9</sup>1+X,+Y,-1+Z

**Table S3. Bond Angles for NpCs-TCPB.**

| Atom             | Atom | Atom             | Angle/°      | Atom             | Atom | Atom             | Angle/°      |
|------------------|------|------------------|--------------|------------------|------|------------------|--------------|
| Np2              | Np1  | Np2 <sup>1</sup> | 97.140 (18)  | O13              | Cs1  | O11 <sup>1</sup> | 153.19 (15)  |
| Np2 <sup>1</sup> | Np1  | Cs1              | 88.423 (19)  | O13              | Cs1  | C2 <sup>7</sup>  | 79.07 (17)   |
| Np2              | Np1  | Cs1              | 60.713 (13)  | O13              | Cs1  | C11 <sup>7</sup> | 74.62 (19)   |
| Np2 <sup>1</sup> | Np1  | Cs2 <sup>2</sup> | 60.499 (14)  | O13              | Cs1  | C12 <sup>7</sup> | 91.91 (19)   |
| Np2              | Np1  | Cs2 <sup>2</sup> | 128.563 (16) | Np2              | Cs2  | Np1 <sup>8</sup> | 160.312 (18) |
| Cs2 <sup>2</sup> | Np1  | Cs1              | 72.210 (15)  | Np2 <sup>5</sup> | Cs2  | Np1 <sup>8</sup> | 56.046 (12)  |
| O1               | Np1  | Np2 <sup>1</sup> | 25.08 (13)   | Np2              | Cs2  | Np2 <sup>5</sup> | 109.794 (18) |
| O1               | Np1  | Np2              | 98.74 (15)   | O1 <sup>8</sup>  | Cs2  | Np1 <sup>8</sup> | 23.43 (9)    |
| O1               | Np1  | Cs1              | 68.20 (13)   | O1 <sup>8</sup>  | Cs2  | Np2 <sup>5</sup> | 35.00 (8)    |
| O1               | Np1  | Cs2 <sup>2</sup> | 41.65 (14)   | O1 <sup>8</sup>  | Cs2  | Np2              | 138.06 (9)   |
| O1               | Np1  | O3               | 88.20 (19)   | O1 <sup>8</sup>  | Cs2  | O5 <sup>6</sup>  | 159.53 (12)  |
| O1               | Np1  | O7 <sup>3</sup>  | 98.29 (18)   | O1 <sup>8</sup>  | Cs2  | O9 <sup>9</sup>  | 58.39 (13)   |
| O1               | Np1  | O9 <sup>4</sup>  | 88.3 (2)     | O1 <sup>8</sup>  | Cs2  | C3 <sup>9</sup>  | 62.75 (15)   |
| O1               | Np1  | O10 <sup>4</sup> | 91.51 (18)   | O1 <sup>8</sup>  | Cs2  | C35 <sup>8</sup> | 101.68 (18)  |
| O1               | Np1  | O12              | 88.25 (19)   | O4               | Cs2  | Np1 <sup>8</sup> | 134.14 (10)  |
| O1               | Np1  | C3 <sup>4</sup>  | 91.9 (2)     | O4 <sup>5</sup>  | Cs2  | Np1 <sup>8</sup> | 76.07 (10)   |
| O2               | Np1  | Np2 <sup>1</sup> | 156.65 (16)  | O4 <sup>5</sup>  | Cs2  | Np2 <sup>5</sup> | 23.73 (9)    |
| O2               | Np1  | Np2              | 83.95 (18)   | O4               | Cs2  | Np2              | 26.21 (9)    |
| O2               | Np1  | Cs1              | 111.92 (16)  | O4               | Cs2  | Np2 <sup>5</sup> | 90.82 (9)    |
| O2               | Np1  | Cs2 <sup>2</sup> | 135.15 (17)  | O4 <sup>5</sup>  | Cs2  | Np2              | 94.20 (10)   |
| O2               | Np1  | O1               | 176.8 (2)    | O4 <sup>5</sup>  | Cs2  | O1 <sup>8</sup>  | 57.69 (13)   |
| O2               | Np1  | O3               | 93.9 (2)     | O4               | Cs2  | O1 <sup>8</sup>  | 112.98 (13)  |
| O2               | Np1  | O7 <sup>3</sup>  | 84.6 (2)     | O4               | Cs2  | O4 <sup>5</sup>  | 82.77 (13)   |
| O2               | Np1  | O9 <sup>4</sup>  | 88.5 (2)     | O4 <sup>5</sup>  | Cs2  | O5 <sup>6</sup>  | 132.97 (13)  |
| O2               | Np1  | O10 <sup>4</sup> | 86.7 (2)     | O4               | Cs2  | O5 <sup>6</sup>  | 59.28 (13)   |
| O2               | Np1  | O12              | 90.8 (2)     | O4               | Cs2  | O8 <sup>3</sup>  | 56.31 (13)   |
| O2               | Np1  | C3 <sup>4</sup>  | 85.3 (2)     | O4 <sup>5</sup>  | Cs2  | O9 <sup>9</sup>  | 103.61 (13)  |
| O3               | Np1  | Np2              | 18.55 (11)   | O4               | Cs2  | O9 <sup>9</sup>  | 160.06 (13)  |
| O3               | Np1  | Np2 <sup>1</sup> | 94.03 (11)   | O4               | Cs2  | C3 <sup>9</sup>  | 139.99 (15)  |
| O3               | Np1  | Cs1              | 42.19 (11)   | O4 <sup>5</sup>  | Cs2  | C3 <sup>9</sup>  | 117.36 (15)  |
| O3               | Np1  | Cs2 <sup>2</sup> | 111.29 (12)  | O4 <sup>5</sup>  | Cs2  | C35 <sup>8</sup> | 127.9 (2)    |
| O3               | Np1  | O7 <sup>3</sup>  | 76.98 (16)   | O4               | Cs2  | C35 <sup>8</sup> | 60.9 (2)     |
| O3               | Np1  | O9 <sup>4</sup>  | 127.89 (15)  | O5 <sup>6</sup>  | Cs2  | Np1 <sup>8</sup> | 150.46 (9)   |
| O3               | Np1  | O10 <sup>4</sup> | 75.81 (16)   | O5 <sup>6</sup>  | Cs2  | Np2 <sup>5</sup> | 149.45 (9)   |
| O3               | Np1  | O12              | 155.11 (17)  | O5 <sup>6</sup>  | Cs2  | Np2              | 40.00 (9)    |
| O3               | Np1  | C3 <sup>4</sup>  | 101.93 (19)  | O5 <sup>6</sup>  | Cs2  | C3 <sup>9</sup>  | 109.64 (14)  |
| O7 <sup>3</sup>  | Np1  | Np2              | 60.50 (11)   | O5 <sup>6</sup>  | Cs2  | C35 <sup>8</sup> | 57.85 (18)   |
| O7 <sup>3</sup>  | Np1  | Np2 <sup>1</sup> | 75.92 (12)   | O8 <sup>3</sup>  | Cs2  | Np1 <sup>8</sup> | 147.07 (8)   |
| O7 <sup>3</sup>  | Np1  | Cs1              | 116.01 (12)  | O8 <sup>3</sup>  | Cs2  | Np2 <sup>5</sup> | 98.11 (9)    |
| O7 <sup>3</sup>  | Np1  | Cs2 <sup>2</sup> | 135.79 (12)  | O8 <sup>3</sup>  | Cs2  | Np2              | 38.18 (9)    |
| O7 <sup>3</sup>  | Np1  | O9 <sup>4</sup>  | 154.68 (16)  | O8 <sup>3</sup>  | Cs2  | O1 <sup>8</sup>  | 132.74 (12)  |
| O7 <sup>3</sup>  | Np1  | O10 <sup>4</sup> | 150.70 (17)  | O8 <sup>3</sup>  | Cs2  | O4 <sup>5</sup>  | 75.06 (13)   |
| O7 <sup>3</sup>  | Np1  | O12              | 79.19 (18)   | O8 <sup>3</sup>  | Cs2  | O5 <sup>6</sup>  | 61.42 (12)   |
| O7 <sup>3</sup>  | Np1  | C3 <sup>4</sup>  | 169.7 (2)    | O8 <sup>3</sup>  | Cs2  | O9 <sup>9</sup>  | 143.42 (13)  |
| O9 <sup>4</sup>  | Np1  | Np2 <sup>1</sup> | 103.68 (13)  | O8 <sup>3</sup>  | Cs2  | C3 <sup>9</sup>  | 157.28 (16)  |
| O9 <sup>4</sup>  | Np1  | Np2              | 142.83 (11)  | O8 <sup>3</sup>  | Cs2  | C35 <sup>8</sup> | 107.65 (19)  |
| O9 <sup>4</sup>  | Np1  | Cs1              | 89.17 (12)   | O9 <sup>9</sup>  | Cs2  | Np1 <sup>8</sup> | 34.98 (9)    |
| O9 <sup>4</sup>  | Np1  | Cs2 <sup>2</sup> | 46.68 (14)   | O9 <sup>9</sup>  | Cs2  | Np2              | 161.66 (9)   |

|                  |     |                  |              |                   |     |                   |             |
|------------------|-----|------------------|--------------|-------------------|-----|-------------------|-------------|
| O9 <sup>4</sup>  | Np1 | O10 <sup>4</sup> | 52.35 (16)   | O9 <sup>9</sup>   | Cs2 | Np2 <sup>5</sup>  | 88.49 (9)   |
| O9 <sup>4</sup>  | Np1 | C3 <sup>4</sup>  | 26.36 (18)   | O9 <sup>9</sup>   | Cs2 | O5 <sup>6</sup>   | 121.66 (12) |
| O10 <sup>4</sup> | Np1 | Np2              | 90.82 (12)   | O9 <sup>9</sup>   | Cs2 | C3 <sup>9</sup>   | 21.21 (15)  |
| O10 <sup>4</sup> | Np1 | Np2 <sup>1</sup> | 116.58 (13)  | O9 <sup>9</sup>   | Cs2 | C35 <sup>8</sup>  | 101.6 (2)   |
| O10 <sup>4</sup> | Np1 | Cs1              | 43.43 (12)   | C3 <sup>9</sup>   | Cs2 | Np1 <sup>8</sup>  | 41.52 (12)  |
| O10 <sup>4</sup> | Np1 | Cs2 <sup>2</sup> | 65.88 (13)   | C3 <sup>9</sup>   | Cs2 | Np2               | 146.08 (11) |
| O10 <sup>4</sup> | Np1 | C3 <sup>4</sup>  | 26.13 (18)   | C3 <sup>9</sup>   | Cs2 | Np2 <sup>5</sup>  | 97.26 (12)  |
| O12              | Np1 | Np2 <sup>1</sup> | 73.19 (12)   | C3 <sup>9</sup>   | Cs2 | C35 <sup>8</sup>  | 80.4 (2)    |
| O12              | Np1 | Np2              | 139.64 (13)  | O13 <sup>8</sup>  | Cs2 | Np1 <sup>8</sup>  | 85.77 (14)  |
| O12              | Np1 | Cs1              | 152.97 (14)  | O13 <sup>8</sup>  | Cs2 | Np2               | 86.32 (14)  |
| O12              | Np1 | Cs2 <sup>2</sup> | 81.42 (14)   | O13 <sup>8</sup>  | Cs2 | Np2 <sup>5</sup>  | 107.59 (14) |
| O12              | Np1 | O9 <sup>4</sup>  | 76.59 (17)   | O13 <sup>8</sup>  | Cs2 | O1 <sup>8</sup>   | 87.28 (16)  |
| O12              | Np1 | O10 <sup>4</sup> | 128.91 (18)  | O13 <sup>8</sup>  | Cs2 | O4                | 74.47 (17)  |
| O12              | Np1 | C3 <sup>4</sup>  | 102.8 (2)    | O13 <sup>8</sup>  | Cs2 | O4 <sup>5</sup>   | 125.87 (17) |
| C3 <sup>4</sup>  | Np1 | Np2 <sup>1</sup> | 114.38 (16)  | O13 <sup>8</sup>  | Cs2 | O5 <sup>6</sup>   | 72.49 (16)  |
| C3 <sup>4</sup>  | Np1 | Np2              | 116.52 (15)  | O13 <sup>8</sup>  | Cs2 | O8 <sup>3</sup>   | 124.35 (16) |
| C3 <sup>4</sup>  | Np1 | Cs1              | 66.47 (16)   | O13 <sup>8</sup>  | Cs2 | O9 <sup>9</sup>   | 86.75 (17)  |
| C3 <sup>4</sup>  | Np1 | Cs2 <sup>2</sup> | 54.32 (15)   | O13 <sup>8</sup>  | Cs2 | C3 <sup>9</sup>   | 65.71 (19)  |
| Np1              | Np2 | Np1 <sup>1</sup> | 82.860 (18)  | O13 <sup>8</sup>  | Cs2 | C35 <sup>8</sup>  | 16.8 (2)    |
| Np1              | Np2 | Cs2 <sup>5</sup> | 121.486 (16) | C35 <sup>8</sup>  | Cs2 | Np1 <sup>8</sup>  | 102.43 (17) |
| Np1              | Np2 | Cs2              | 110.560 (19) | C35 <sup>8</sup>  | Cs2 | Np2               | 69.83 (18)  |
| Np1 <sup>1</sup> | Np2 | Cs2 <sup>5</sup> | 63.456 (16)  | C35 <sup>8</sup>  | Cs2 | Np2 <sup>5</sup>  | 115.34 (17) |
| Cs2              | Np2 | Np1 <sup>1</sup> | 131.308 (15) | Np1               | O1  | Np2 <sup>1</sup>  | 135.6 (2)   |
| Cs2              | Np2 | Cs2 <sup>5</sup> | 70.205 (18)  | Np1               | O1  | Cs2 <sup>2</sup>  | 114.92 (19) |
| O1 <sup>1</sup>  | Np2 | Np1 <sup>1</sup> | 19.32 (11)   | Np2 <sup>1</sup>  | O1  | Cs2 <sup>2</sup>  | 96.57 (16)  |
| O1 <sup>1</sup>  | Np2 | Np1              | 85.03 (12)   | Np1               | O3  | Cs1               | 106.10 (17) |
| O1 <sup>1</sup>  | Np2 | Cs2 <sup>5</sup> | 48.43 (12)   | Np2               | O3  | Np1               | 137.4 (2)   |
| O1 <sup>1</sup>  | Np2 | Cs2              | 112.57 (12)  | Np2               | O3  | Cs1               | 116.43 (19) |
| O1 <sup>1</sup>  | Np2 | O5 <sup>6</sup>  | 159.18 (16)  | Np2               | O4  | Cs2               | 104.5 (2)   |
| O1 <sup>1</sup>  | Np2 | O6 <sup>6</sup>  | 148.81 (17)  | Np2               | O4  | Cs2 <sup>5</sup>  | 112.11 (19) |
| O1 <sup>1</sup>  | Np2 | O8 <sup>3</sup>  | 78.95 (16)   | Cs2               | O4  | Cs2 <sup>5</sup>  | 97.23 (13)  |
| O1 <sup>1</sup>  | Np2 | C1 <sup>6</sup>  | 170.38 (18)  | Np2 <sup>6</sup>  | O5  | Cs2 <sup>6</sup>  | 86.03 (13)  |
| O3               | Np2 | Np1              | 24.06 (14)   | C1                | O5  | Np2 <sup>6</sup>  | 90.4 (4)    |
| O3               | Np2 | Np1 <sup>1</sup> | 79.96 (14)   | C1                | O5  | Cs2 <sup>6</sup>  | 145.9 (5)   |
| O3               | Np2 | Cs2 <sup>5</sup> | 135.97 (13)  | Np2 <sup>6</sup>  | O6  | Cs1 <sup>6</sup>  | 88.05 (14)  |
| O3               | Np2 | Cs2              | 129.88 (15)  | C1                | O6  | Np2 <sup>6</sup>  | 94.1 (4)    |
| O3               | Np2 | O1 <sup>1</sup>  | 89.78 (18)   | C1                | O6  | Cs1 <sup>6</sup>  | 118.1 (4)   |
| O3               | Np2 | O5 <sup>6</sup>  | 89.57 (19)   | Np1 <sup>3</sup>  | O7  | Cs1 <sup>10</sup> | 135.9 (2)   |
| O3               | Np2 | O6 <sup>6</sup>  | 82.75 (18)   | C2                | O7  | Np1 <sup>3</sup>  | 129.1 (4)   |
| O3               | Np2 | O8 <sup>3</sup>  | 93.78 (18)   | C2                | O7  | Cs1 <sup>10</sup> | 95.0 (4)    |
| O3               | Np2 | O11 <sup>1</sup> | 90.8 (2)     | Np2 <sup>3</sup>  | O8  | Cs2 <sup>3</sup>  | 90.22 (14)  |
| O3               | Np2 | C1 <sup>6</sup>  | 81.4 (2)     | C2                | O8  | Np2 <sup>3</sup>  | 123.1 (5)   |
| O4               | Np2 | Np1              | 155.22 (15)  | C2                | O8  | Cs2 <sup>3</sup>  | 145.7 (5)   |
| O4               | Np2 | Np1 <sup>1</sup> | 100.61 (15)  | Np1 <sup>11</sup> | O9  | Cs2 <sup>12</sup> | 98.34 (18)  |
| O4               | Np2 | Cs2 <sup>5</sup> | 44.15 (14)   | C3                | O9  | Np1 <sup>11</sup> | 93.4 (4)    |
| O4               | Np2 | Cs2              | 49.25 (16)   | C3                | O9  | Cs2 <sup>12</sup> | 95.0 (5)    |
| O4               | Np2 | O1 <sup>1</sup>  | 90.58 (19)   | Np1 <sup>11</sup> | O10 | Cs1 <sup>11</sup> | 102.29 (17) |
| O4               | Np2 | O3               | 179.1 (2)    | C3                | O10 | Np1 <sup>11</sup> | 92.5 (4)    |
| O4               | Np2 | O5 <sup>6</sup>  | 89.81 (19)   | C3                | O10 | Cs1 <sup>11</sup> | 143.7 (5)   |
| O4               | Np2 | O6 <sup>6</sup>  | 97.34 (18)   | Np2 <sup>1</sup>  | O11 | Cs1 <sup>1</sup>  | 89.21 (15)  |

|                  |     |                  |              |                   |     |                   |            |
|------------------|-----|------------------|--------------|-------------------|-----|-------------------|------------|
| O4               | Np2 | O8 <sup>3</sup>  | 85.50 (19)   | C4                | O11 | Np2 <sup>1</sup>  | 145.5 (4)  |
| O4               | Np2 | O11 <sup>1</sup> | 90.1 (2)     | C4                | O11 | Cs1 <sup>1</sup>  | 116.5 (5)  |
| O4               | Np2 | C1 <sup>6</sup>  | 98.3 (2)     | C4                | O12 | Np1               | 123.7 (5)  |
| O5 <sup>6</sup>  | Np2 | Np1              | 85.92 (12)   | O5                | C1  | Np2 <sup>6</sup>  | 63.7 (4)   |
| O5 <sup>6</sup>  | Np2 | Np1 <sup>1</sup> | 168.77 (12)  | O5                | C1  | O6                | 120.7 (6)  |
| O5 <sup>6</sup>  | Np2 | Cs2 <sup>5</sup> | 123.91 (11)  | O5                | C1  | C5                | 120.9 (7)  |
| O5 <sup>6</sup>  | Np2 | Cs2              | 53.97 (11)   | O6                | C1  | Np2 <sup>6</sup>  | 59.6 (3)   |
| O5 <sup>6</sup>  | Np2 | C1 <sup>6</sup>  | 25.91 (18)   | O6                | C1  | C5                | 118.4 (6)  |
| O6 <sup>6</sup>  | Np2 | Np1 <sup>1</sup> | 130.01 (12)  | C5                | C1  | Np2 <sup>6</sup>  | 161.6 (5)  |
| O6 <sup>6</sup>  | Np2 | Np1              | 98.97 (12)   | O7                | C2  | Cs1 <sup>10</sup> | 65.0 (4)   |
| O6 <sup>6</sup>  | Np2 | Cs2              | 95.08 (12)   | O7                | C2  | C11               | 116.3 (6)  |
| O6 <sup>6</sup>  | Np2 | Cs2 <sup>5</sup> | 139.48 (12)  | O8                | C2  | Cs1 <sup>10</sup> | 128.1 (5)  |
| O6 <sup>6</sup>  | Np2 | O5 <sup>6</sup>  | 51.48 (16)   | O8                | C2  | O7                | 124.6 (6)  |
| O6 <sup>6</sup>  | Np2 | C1 <sup>6</sup>  | 26.27 (18)   | O8                | C2  | C11               | 119.0 (7)  |
| O8 <sup>3</sup>  | Np2 | Np1 <sup>1</sup> | 96.21 (12)   | C11               | C2  | Cs1 <sup>10</sup> | 75.2 (4)   |
| O8 <sup>3</sup>  | Np2 | Np1              | 69.72 (12)   | Np1 <sup>11</sup> | C3  | Cs2 <sup>12</sup> | 84.16 (18) |
| O8 <sup>3</sup>  | Np2 | Cs2              | 51.59 (12)   | O9                | C3  | Np1 <sup>11</sup> | 60.2 (4)   |
| O8 <sup>3</sup>  | Np2 | Cs2 <sup>5</sup> | 68.35 (12)   | O9                | C3  | Cs2 <sup>12</sup> | 63.8 (4)   |
| O8 <sup>3</sup>  | Np2 | O5 <sup>6</sup>  | 80.32 (16)   | O9                | C3  | C17               | 118.8 (7)  |
| O8 <sup>3</sup>  | Np2 | O6 <sup>6</sup>  | 131.58 (17)  | O10               | C3  | Np1 <sup>11</sup> | 61.3 (4)   |
| O8 <sup>3</sup>  | Np2 | C1 <sup>6</sup>  | 105.34 (19)  | O10               | C3  | Cs2 <sup>12</sup> | 103.4 (5)  |
| O11 <sup>1</sup> | Np2 | Np1 <sup>1</sup> | 60.40 (11)   | O10               | C3  | O9                | 121.0 (7)  |
| O11 <sup>1</sup> | Np2 | Np1              | 112.38 (13)  | O10               | C3  | C17               | 120.1 (6)  |
| O11 <sup>1</sup> | Np2 | Cs2              | 136.74 (13)  | C17               | C3  | Np1 <sup>11</sup> | 171.9 (6)  |
| O11 <sup>1</sup> | Np2 | Cs2 <sup>5</sup> | 91.54 (12)   | C17               | C3  | Cs2 <sup>12</sup> | 102.7 (5)  |
| O11 <sup>1</sup> | Np2 | O1 <sup>1</sup>  | 76.47 (16)   | O11               | C4  | C23               | 116.9 (6)  |
| O11 <sup>1</sup> | Np2 | O5 <sup>6</sup>  | 124.35 (15)  | O12               | C4  | O11               | 124.7 (6)  |
| O11 <sup>1</sup> | Np2 | O6 <sup>6</sup>  | 73.41 (16)   | O12               | C4  | C23               | 118.3 (7)  |
| O11 <sup>1</sup> | Np2 | O8 <sup>3</sup>  | 154.98 (16)  | C6                | C5  | C1                | 118.6 (7)  |
| O11 <sup>1</sup> | Np2 | C1 <sup>6</sup>  | 99.67 (18)   | C6                | C5  | C10               | 118.1 (6)  |
| C1 <sup>6</sup>  | Np2 | Np1 <sup>1</sup> | 152.29 (15)  | C10               | C5  | C1                | 123.3 (7)  |
| C1 <sup>6</sup>  | Np2 | Np1              | 88.41 (14)   | C5                | C6  | C7                | 120.8 (7)  |
| C1 <sup>6</sup>  | Np2 | Cs2 <sup>5</sup> | 141.06 (14)  | C6                | C7  | C8                | 121.6 (7)  |
| C1 <sup>6</sup>  | Np2 | Cs2              | 76.35 (15)   | C7                | C8  | C9                | 117.8 (6)  |
| Np1              | Cs1 | Cs2 <sup>2</sup> | 53.297 (14)  | C7                | C8  | C29               | 119.2 (7)  |
| Np2              | Cs1 | Np1              | 54.956 (13)  | C9                | C8  | C29               | 122.9 (7)  |
| Np2              | Cs1 | Cs2 <sup>2</sup> | 105.525 (19) | C10               | C9  | C8                | 119.9 (7)  |
| O3               | Cs1 | Np1              | 31.71 (9)    | C5                | C10 | C9                | 121.8 (7)  |
| O3               | Cs1 | Np2              | 23.26 (9)    | C2                | C11 | Cs1 <sup>10</sup> | 81.2 (4)   |
| O3               | Cs1 | Cs2 <sup>2</sup> | 83.11 (9)    | C12               | C11 | Cs1 <sup>10</sup> | 79.8 (4)   |
| O3               | Cs1 | O6 <sup>6</sup>  | 52.01 (12)   | C12               | C11 | C2                | 119.1 (6)  |
| O3               | Cs1 | O7 <sup>7</sup>  | 62.38 (12)   | C12               | C11 | C16               | 119.2 (6)  |
| O3               | Cs1 | O10 <sup>4</sup> | 59.00 (13)   | C16               | C11 | Cs1 <sup>10</sup> | 108.7 (5)  |
| O3               | Cs1 | O11 <sup>1</sup> | 54.83 (12)   | C16               | C11 | C2                | 121.8 (7)  |
| O3               | Cs1 | C2 <sup>7</sup>  | 78.33 (14)   | C11               | C12 | Cs1 <sup>10</sup> | 78.1 (4)   |
| O3               | Cs1 | C11 <sup>7</sup> | 101.08 (13)  | C13               | C12 | Cs1 <sup>10</sup> | 108.3 (5)  |
| O3               | Cs1 | C12 <sup>7</sup> | 106.38 (14)  | C13               | C12 | C11               | 121.0 (7)  |
| O3               | Cs1 | O13              | 115.31 (16)  | C12               | C13 | C14               | 120.5 (7)  |
| O6 <sup>6</sup>  | Cs1 | Np1              | 77.85 (8)    | C13               | C14 | C31               | 119.2 (7)  |
| O6 <sup>6</sup>  | Cs1 | Np2              | 35.86 (7)    | C15               | C14 | C13               | 118.3 (6)  |

|                  |     |                  |             |                  |     |                  |            |
|------------------|-----|------------------|-------------|------------------|-----|------------------|------------|
| O6 <sup>6</sup>  | Cs1 | Cs2 <sup>2</sup> | 130.42 (8)  | C15              | C14 | C31              | 122.4 (7)  |
| O6 <sup>6</sup>  | Cs1 | O11 <sup>1</sup> | 48.96 (12)  | C16              | C15 | C14              | 121.3 (7)  |
| O6 <sup>6</sup>  | Cs1 | C2 <sup>7</sup>  | 118.49 (13) | C15              | C16 | C11              | 119.7 (7)  |
| O6 <sup>6</sup>  | Cs1 | C11 <sup>7</sup> | 131.65 (14) | C18              | C17 | C3               | 120.3 (7)  |
| O6 <sup>6</sup>  | Cs1 | C12 <sup>7</sup> | 117.82 (15) | C18              | C17 | C22              | 121.1 (7)  |
| O7 <sup>7</sup>  | Cs1 | Np1              | 68.09 (8)   | C22              | C17 | C3               | 118.6 (6)  |
| O7 <sup>7</sup>  | Cs1 | Np2              | 64.84 (9)   | C17              | C18 | C19              | 119.4 (7)  |
| O7 <sup>7</sup>  | Cs1 | Cs2 <sup>2</sup> | 73.00 (9)   | C20              | C19 | C18              | 120.0 (6)  |
| O7 <sup>7</sup>  | Cs1 | O6 <sup>6</sup>  | 98.44 (12)  | C19              | C20 | C21              | 119.7 (7)  |
| O7 <sup>7</sup>  | Cs1 | O11 <sup>1</sup> | 55.98 (12)  | C19              | C20 | C32              | 120.4 (6)  |
| O7 <sup>7</sup>  | Cs1 | C2 <sup>7</sup>  | 20.06 (13)  | C21              | C20 | C32              | 119.8 (7)  |
| O7 <sup>7</sup>  | Cs1 | C11 <sup>7</sup> | 39.24 (13)  | C22              | C21 | C20              | 120.2 (7)  |
| O7 <sup>7</sup>  | Cs1 | C12 <sup>7</sup> | 46.47 (13)  | C21              | C22 | C17              | 119.5 (7)  |
| O10 <sup>4</sup> | Cs1 | Np1              | 34.29 (9)   | C24              | C23 | C4               | 120.1 (6)  |
| O10 <sup>4</sup> | Cs1 | Np2              | 79.04 (10)  | C28              | C23 | C4               | 120.5 (7)  |
| O10 <sup>4</sup> | Cs1 | Cs2 <sup>2</sup> | 51.49 (10)  | C28              | C23 | C24              | 119.4 (6)  |
| O10 <sup>4</sup> | Cs1 | O6 <sup>6</sup>  | 84.17 (13)  | C25              | C24 | C23              | 120.1 (6)  |
| O10 <sup>4</sup> | Cs1 | O7 <sup>7</sup>  | 100.17 (12) | C26              | C25 | C24              | 120.5 (7)  |
| O10 <sup>4</sup> | Cs1 | O11 <sup>1</sup> | 113.24 (13) | C25              | C26 | C27              | 119.4 (6)  |
| O10 <sup>4</sup> | Cs1 | C2 <sup>7</sup>  | 100.69 (15) | C25              | C26 | C34              | 120.6 (6)  |
| O10 <sup>4</sup> | Cs1 | C11 <sup>7</sup> | 118.27 (15) | C27              | C26 | C34              | 119.7 (6)  |
| O10 <sup>4</sup> | Cs1 | C12 <sup>7</sup> | 139.63 (15) | C26              | C27 | C28              | 121.3 (6)  |
| O10 <sup>4</sup> | Cs1 | O13              | 67.21 (18)  | C27              | C28 | C23              | 119.4 (7)  |
| O11 <sup>1</sup> | Cs1 | Np1              | 84.87 (8)   | C30              | C29 | C8               | 117.9 (7)  |
| O11 <sup>1</sup> | Cs1 | Np2              | 34.48 (8)   | C30              | C29 | C34              | 117.7 (6)  |
| O11 <sup>1</sup> | Cs1 | Cs2 <sup>2</sup> | 123.90 (8)  | C34              | C29 | C8               | 124.4 (6)  |
| O11 <sup>1</sup> | Cs1 | C2 <sup>7</sup>  | 74.51 (14)  | C31              | C30 | C29              | 122.8 (7)  |
| O11 <sup>1</sup> | Cs1 | C11 <sup>7</sup> | 82.80 (14)  | C30              | C31 | C14              | 119.4 (7)  |
| O11 <sup>1</sup> | Cs1 | C12 <sup>7</sup> | 70.51 (15)  | C30              | C31 | C32              | 119.0 (6)  |
| C2 <sup>7</sup>  | Cs1 | Np1              | 74.66 (11)  | C32              | C31 | C14              | 121.4 (6)  |
| C2 <sup>7</sup>  | Cs1 | Np2              | 84.37 (11)  | C31              | C32 | C20              | 123.6 (6)  |
| C2 <sup>7</sup>  | Cs1 | Cs2 <sup>2</sup> | 60.69 (11)  | C33              | C32 | C20              | 118.4 (7)  |
| C11 <sup>7</sup> | Cs1 | Np1              | 97.28 (10)  | C33              | C32 | C31              | 117.9 (6)  |
| C11 <sup>7</sup> | Cs1 | Np2              | 102.86 (11) | C34              | C33 | C32              | 123.1 (7)  |
| C11 <sup>7</sup> | Cs1 | Cs2 <sup>2</sup> | 69.69 (12)  | C29              | C34 | C26              | 125.0 (6)  |
| C11 <sup>7</sup> | Cs1 | C2 <sup>7</sup>  | 23.58 (15)  | C33              | C34 | C26              | 115.4 (6)  |
| C11 <sup>7</sup> | Cs1 | C12 <sup>7</sup> | 22.13 (16)  | C33              | C34 | C29              | 119.4 (6)  |
| C12 <sup>7</sup> | Cs1 | Np1              | 113.33 (11) | Cs2 <sup>2</sup> | O13 | Cs1              | 111.7 (2)  |
| C12 <sup>7</sup> | Cs1 | Np2              | 99.15 (12)  | C35              | O13 | Cs1              | 121.5 (7)  |
| C12 <sup>7</sup> | Cs1 | Cs2 <sup>2</sup> | 91.75 (12)  | C35              | O13 | Cs2 <sup>2</sup> | 118.8 (6)  |
| C12 <sup>7</sup> | Cs1 | C2 <sup>7</sup>  | 39.69 (16)  | C35              | N1  | C36              | 122.3 (10) |
| O13              | Cs1 | Np1              | 83.86 (13)  | C35              | N1  | C37              | 117.7 (10) |
| O13              | Cs1 | Np2              | 138.46 (13) | C36              | N1  | C37              | 119.8 (9)  |
| O13              | Cs1 | Cs2 <sup>2</sup> | 33.76 (12)  | O13              | C35 | Cs2 <sup>2</sup> | 44.4 (5)   |
| O13              | Cs1 | O6 <sup>6</sup>  | 149.37 (17) | O13              | C35 | N1               | 121.6 (11) |
| O13              | Cs1 | O7 <sup>7</sup>  | 97.21 (16)  | N1               | C35 | Cs2 <sup>2</sup> | 133.4 (7)  |

<sup>1</sup>1-X,2-Y,-Z; <sup>2</sup>-1+X,+Y,+Z; <sup>3</sup>1-X,1-Y,1-Z; <sup>4</sup>+X,+Y,-1+Z; <sup>5</sup>2-X,2-Y,-Z; <sup>6</sup>1-X,1-Y,-Z; <sup>7</sup>+X,1+Y,-1+Z; <sup>8</sup>1+X,+Y,+Z; <sup>9</sup>1+X,+Y,-1+Z; <sup>10</sup>+X,-1+Y,1+Z; <sup>11</sup>+X,+Y,1+Z; <sup>12</sup>-1+X,+Y,1+Z

**Table S4.** Torsion Angles for **NpCs-TCPB**.

| <b>A</b>         | <b>B</b> | <b>C</b> | <b>D</b>         | <b>Angle/°</b> | <b>A</b>         | <b>B</b> | <b>C</b> | <b>D</b>         | <b>Angle/°</b> |
|------------------|----------|----------|------------------|----------------|------------------|----------|----------|------------------|----------------|
| Np1 <sup>1</sup> | Np2      | O3       | Np1              | -95.0 (3)      | O9 <sup>9</sup>  | Np1      | O1       | Cs2 <sup>7</sup> | -2.40 (18)     |
| Np1              | Np2      | O3       | Cs1              | -176.1 (5)     | O9               | C3       | C17      | C18              | -160.5 (8)     |
| Np1 <sup>1</sup> | Np2      | O3       | Cs1              | 88.91 (17)     | O9               | C3       | C17      | C22              | 16.5 (12)      |
| Np1              | Np2      | O4       | Cs2              | 40.5 (4)       | O10 <sup>9</sup> | Np1      | O1       | Np2 <sup>1</sup> | -179.2 (3)     |
| Np1 <sup>1</sup> | Np2      | O4       | Cs2 <sup>2</sup> | 32.25 (18)     | O10 <sup>9</sup> | Np1      | O1       | Cs2 <sup>7</sup> | 49.9 (2)       |
| Np1 <sup>1</sup> | Np2      | O4       | Cs2              | 136.47 (10)    | O10              | C3       | C17      | C18              | 18.7 (12)      |
| Np1              | Np2      | O4       | Cs2 <sup>2</sup> | -63.7 (4)      | O10              | C3       | C17      | C22              | -164.3 (8)     |
| Np1 <sup>3</sup> | O7       | C2       | Cs1 <sup>4</sup> | 179.7 (5)      | O11 <sup>1</sup> | Np2      | O3       | Np1              | -154.7 (3)     |
| Np1 <sup>3</sup> | O7       | C2       | O8               | -60.0 (9)      | O11 <sup>1</sup> | Np2      | O3       | Cs1              | 29.2 (2)       |
| Np1 <sup>3</sup> | O7       | C2       | C11              | 122.8 (5)      | O11 <sup>1</sup> | Np2      | O4       | Cs2 <sup>2</sup> | 92.1 (2)       |
| Np1 <sup>5</sup> | O9       | C3       | Cs2 <sup>6</sup> | -98.7 (2)      | O11 <sup>1</sup> | Np2      | O4       | Cs2              | -163.68 (16)   |
| Np1 <sup>5</sup> | O9       | C3       | O10              | -8.4 (8)       | O11              | C4       | C23      | C24              | -158.1 (7)     |
| Np1 <sup>5</sup> | O9       | C3       | C17              | 170.8 (6)      | O11              | C4       | C23      | C28              | 19.6 (10)      |
| Np1 <sup>5</sup> | O10      | C3       | Cs2 <sup>6</sup> | 75.5 (3)       | O12              | Np1      | O1       | Np2 <sup>1</sup> | 51.9 (3)       |
| Np1 <sup>5</sup> | O10      | C3       | O9               | 8.3 (8)        | O12              | Np1      | O1       | Cs2 <sup>7</sup> | -79.0 (2)      |
| Np1 <sup>5</sup> | O10      | C3       | C17              | -170.8 (7)     | O12              | C4       | C23      | C24              | 18.8 (11)      |
| Np1              | O12      | C4       | O11              | 16.6 (11)      | O12              | C4       | C23      | C28              | -163.5 (7)     |
| Np1              | O12      | C4       | C23              | -160.0 (5)     | C1 <sup>8</sup>  | Np2      | O3       | Np1              | 105.6 (4)      |
| Np2              | Np1      | O1       | Np2 <sup>1</sup> | -88.2 (3)      | C1 <sup>8</sup>  | Np2      | O3       | Cs1              | -70.5 (2)      |
| Np2 <sup>1</sup> | Np1      | O1       | Cs2 <sup>7</sup> | -130.9 (4)     | C1 <sup>8</sup>  | Np2      | O4       | Cs2 <sup>2</sup> | -168.1 (2)     |
| Np2              | Np1      | O1       | Cs2 <sup>7</sup> | 140.92 (14)    | C1 <sup>8</sup>  | Np2      | O4       | Cs2              | -63.89 (19)    |
| Np2 <sup>8</sup> | O5       | C1       | O6               | -18.1 (7)      | C1               | C5       | C6       | C7               | 174.3 (7)      |
| Np2 <sup>8</sup> | O5       | C1       | C5               | 159.7 (6)      | C1               | C5       | C10      | C9               | -176.3 (7)     |
| Np2 <sup>8</sup> | O6       | C1       | O5               | 18.9 (7)       | C2               | C11      | C12      | Cs1 <sup>4</sup> | 73.9 (6)       |
| Np2 <sup>8</sup> | O6       | C1       | C5               | -159.0 (6)     | C2               | C11      | C12      | C13              | 178.2 (7)      |
| Np2 <sup>3</sup> | O8       | C2       | Cs1 <sup>4</sup> | 77.6 (6)       | C2               | C11      | C16      | C15              | -176.7 (7)     |
| Np2 <sup>3</sup> | O8       | C2       | O7               | -5.9 (10)      | C3 <sup>9</sup>  | Np1      | O1       | Np2 <sup>1</sup> | 154.6 (3)      |
| Np2 <sup>3</sup> | O8       | C2       | C11              | 171.2 (4)      | C3 <sup>9</sup>  | Np1      | O1       | Cs2 <sup>7</sup> | 23.7 (2)       |
| Np2 <sup>1</sup> | O11      | C4       | O12              | 32.3 (14)      | C3               | C17      | C18      | C19              | 175.7 (7)      |
| Np2 <sup>1</sup> | O11      | C4       | C23              | -151.1 (6)     | C3               | C17      | C22      | C21              | -175.6 (8)     |
| Np2 <sup>8</sup> | C1       | C5       | C6               | -56.8 (19)     | C4               | C23      | C24      | C25              | 176.4 (7)      |
| Np2 <sup>8</sup> | C1       | C5       | C10              | 119.9 (15)     | C4               | C23      | C28      | C27              | -177.0 (7)     |
| Cs1              | Np1      | O1       | Np2 <sup>1</sup> | -141.7 (4)     | C5               | C6       | C7       | C8               | 3.0 (12)       |
| Cs1              | Np1      | O1       | Cs2 <sup>7</sup> | 87.40 (15)     | C6               | C5       | C10      | C9               | 0.4 (11)       |
| Cs1 <sup>8</sup> | O6       | C1       | Np2 <sup>8</sup> | 90.0 (3)       | C6               | C7       | C8       | C9               | -1.3 (11)      |
| Cs1 <sup>8</sup> | O6       | C1       | O5               | 108.9 (7)      | C6               | C7       | C8       | C29              | -177.9 (7)     |
| Cs1 <sup>8</sup> | O6       | C1       | C5               | -69.0 (7)      | C7               | C8       | C9       | C10              | -0.8 (10)      |
| Cs1 <sup>4</sup> | O7       | C2       | O8               | 120.3 (7)      | C7               | C8       | C29      | C30              | -44.9 (10)     |
| Cs1 <sup>4</sup> | O7       | C2       | C11              | -56.9 (6)      | C7               | C8       | C29      | C34              | 131.5 (8)      |
| Cs1 <sup>5</sup> | O10      | C3       | Np1 <sup>5</sup> | -114.8 (7)     | C8               | C9       | C10      | C5               | 1.3 (11)       |
| Cs1 <sup>5</sup> | O10      | C3       | Cs2 <sup>6</sup> | -39.3 (8)      | C8               | C29      | C30      | C31              | 175.4 (7)      |
| Cs1 <sup>5</sup> | O10      | C3       | O9               | -106.5 (8)     | C8               | C29      | C34      | C26              | -2.3 (12)      |
| Cs1 <sup>5</sup> | O10      | C3       | C17              | 74.3 (10)      | C8               | C29      | C34      | C33              | -177.0 (7)     |
| Cs1 <sup>1</sup> | O11      | C4       | O12              | -101.9 (7)     | C9               | C8       | C29      | C30              | 138.7 (7)      |
| Cs1 <sup>1</sup> | O11      | C4       | C23              | 74.7 (7)       | C9               | C8       | C29      | C34              | -45.0 (11)     |
| Cs1 <sup>4</sup> | C2       | C11      | C12              | -73.1 (6)      | C10              | C5       | C6       | C7               | -2.5 (11)      |
| Cs1 <sup>4</sup> | C2       | C11      | C16              | 106.7 (7)      | C11              | C12      | C13      | C14              | 0.5 (11)       |
| Cs1 <sup>4</sup> | C11      | C12      | C13              | 104.3 (7)      | C12              | C11      | C16      | C15              | 3.1 (11)       |

|                  |     |     |                  |              |     |     |     |                  |            |
|------------------|-----|-----|------------------|--------------|-----|-----|-----|------------------|------------|
| Cs1 <sup>4</sup> | C11 | C16 | C15              | -85.5 (7)    | C12 | C13 | C14 | C15              | -1.0 (11)  |
| Cs1 <sup>4</sup> | C12 | C13 | C14              | 87.3 (7)     | C12 | C13 | C14 | C31              | -179.2 (7) |
| Cs1              | O13 | C35 | Cs2 <sup>7</sup> | -146.2 (9)   | C13 | C14 | C15 | C16              | 2.5 (11)   |
| Cs1              | O13 | C35 | N1               | 92.3 (11)    | C13 | C14 | C31 | C30              | 121.9 (8)  |
| Cs2 <sup>7</sup> | Np1 | O1  | Np2 <sup>1</sup> | 130.9 (4)    | C13 | C14 | C31 | C32              | -54.1 (10) |
| Cs2              | Np2 | O3  | Np1              | 41.5 (4)     | C14 | C15 | C16 | C11              | -3.6 (11)  |
| Cs2 <sup>2</sup> | Np2 | O3  | Np1              | -61.7 (4)    | C14 | C31 | C32 | C20              | -3.6 (12)  |
| Cs2              | Np2 | O3  | Cs1              | -134.57 (12) | C14 | C31 | C32 | C33              | 173.7 (7)  |
| Cs2 <sup>2</sup> | Np2 | O3  | Cs1              | 122.17 (14)  | C15 | C14 | C31 | C30              | -56.3 (10) |
| Cs2 <sup>2</sup> | Np2 | O4  | Cs2              | 104.2 (2)    | C15 | C14 | C31 | C32              | 127.7 (8)  |
| Cs2              | Np2 | O4  | Cs2 <sup>2</sup> | -104.2 (2)   | C16 | C11 | C12 | Cs1 <sup>4</sup> | -105.9 (6) |
| Cs2 <sup>8</sup> | O5  | C1  | Np2 <sup>8</sup> | 83.5 (7)     | C16 | C11 | C12 | C13              | -1.6 (11)  |
| Cs2 <sup>8</sup> | O5  | C1  | O6               | 65.4 (11)    | C17 | C18 | C19 | C20              | 0.3 (12)   |
| Cs2 <sup>8</sup> | O5  | C1  | C5               | -116.8 (8)   | C18 | C17 | C22 | C21              | 1.4 (13)   |
| Cs2 <sup>3</sup> | O8  | C2  | Cs1 <sup>4</sup> | -117.8 (7)   | C18 | C19 | C20 | C21              | 0.6 (12)   |
| Cs2 <sup>3</sup> | O8  | C2  | O7               | 158.7 (5)    | C18 | C19 | C20 | C32              | -177.0 (7) |
| Cs2 <sup>3</sup> | O8  | C2  | C11              | -24.2 (11)   | C19 | C20 | C21 | C22              | -0.5 (12)  |
| Cs2 <sup>6</sup> | O9  | C3  | Np1 <sup>5</sup> | 98.7 (2)     | C19 | C20 | C32 | C31              | 125.1 (8)  |
| Cs2 <sup>6</sup> | O9  | C3  | O10              | 90.3 (7)     | C19 | C20 | C32 | C33              | -52.2 (11) |
| Cs2 <sup>6</sup> | O9  | C3  | C17              | -90.5 (7)    | C20 | C21 | C22 | C17              | -0.5 (13)  |
| Cs2 <sup>6</sup> | C3  | C17 | C18              | 132.6 (7)    | C20 | C32 | C33 | C34              | 178.0 (7)  |
| Cs2 <sup>6</sup> | C3  | C17 | C22              | -50.3 (8)    | C21 | C20 | C32 | C31              | -52.5 (11) |
| Cs2 <sup>7</sup> | O13 | C35 | N1               | -121.6 (9)   | C21 | C20 | C32 | C33              | 130.2 (8)  |
| O1 <sup>1</sup>  | Np2 | O3  | Np1              | -78.3 (3)    | C22 | C17 | C18 | C19              | -1.3 (13)  |
| O1 <sup>1</sup>  | Np2 | O3  | Cs1              | 105.6 (2)    | C23 | C24 | C25 | C26              | 0.4 (11)   |
| O1 <sup>1</sup>  | Np2 | O4  | Cs2 <sup>2</sup> | 15.6 (2)     | C24 | C23 | C28 | C27              | 0.7 (11)   |
| O1 <sup>1</sup>  | Np2 | O4  | Cs2              | 119.85 (16)  | C24 | C25 | C26 | C27              | 1.2 (11)   |
| O3               | Np1 | O1  | Np2 <sup>1</sup> | -103.5 (3)   | C24 | C25 | C26 | C34              | -172.2 (7) |
| O3               | Np1 | O1  | Cs2 <sup>7</sup> | 125.60 (19)  | C25 | C26 | C27 | C28              | -1.9 (11)  |
| O5 <sup>8</sup>  | Np2 | O3  | Np1              | 80.9 (3)     | C25 | C26 | C34 | C29              | -49.6 (11) |
| O5 <sup>8</sup>  | Np2 | O3  | Cs1              | -95.2 (2)    | C25 | C26 | C34 | C33              | 125.3 (8)  |
| O5 <sup>8</sup>  | Np2 | O4  | Cs2              | -39.32 (16)  | C26 | C27 | C28 | C23              | 0.9 (11)   |
| O5 <sup>8</sup>  | Np2 | O4  | Cs2 <sup>2</sup> | -143.55 (19) | C27 | C26 | C34 | C29              | 137.1 (8)  |
| O5               | C1  | C5  | C6               | -156.1 (7)   | C27 | C26 | C34 | C33              | -48.0 (10) |
| O5               | C1  | C5  | C10              | 20.6 (11)    | C28 | C23 | C24 | C25              | -1.4 (11)  |
| O6 <sup>8</sup>  | Np2 | O3  | Np1              | 132.1 (4)    | C29 | C8  | C9  | C10              | 175.7 (7)  |
| O6 <sup>8</sup>  | Np2 | O3  | Cs1              | -44.0 (2)    | C29 | C30 | C31 | C14              | -173.4 (7) |
| O6 <sup>8</sup>  | Np2 | O4  | Cs2              | -90.39 (17)  | C29 | C30 | C31 | C32              | 2.7 (11)   |
| O6 <sup>8</sup>  | Np2 | O4  | Cs2 <sup>2</sup> | 165.38 (18)  | C30 | C29 | C34 | C26              | 174.1 (7)  |
| O6               | C1  | C5  | C6               | 21.8 (10)    | C30 | C29 | C34 | C33              | -0.6 (11)  |
| O6               | C1  | C5  | C10              | -161.6 (7)   | C30 | C31 | C32 | C20              | -179.6 (7) |
| O7 <sup>3</sup>  | Np1 | O1  | Np2 <sup>1</sup> | -26.9 (4)    | C30 | C31 | C32 | C33              | -2.3 (11)  |
| O7 <sup>3</sup>  | Np1 | O1  | Cs2 <sup>7</sup> | -157.83 (17) | C31 | C14 | C15 | C16              | -179.3 (7) |
| O7               | C2  | C11 | Cs1 <sup>4</sup> | 51.7 (6)     | C31 | C32 | C33 | C34              | 0.6 (12)   |
| O7               | C2  | C11 | C12              | -21.4 (10)   | C32 | C20 | C21 | C22              | 177.1 (8)  |
| O7               | C2  | C11 | C16              | 158.4 (7)    | C32 | C33 | C34 | C26              | -174.2 (7) |
| O8 <sup>3</sup>  | Np2 | O3  | Np1              | 0.7 (3)      | C32 | C33 | C34 | C29              | 0.9 (12)   |
| O8 <sup>3</sup>  | Np2 | O3  | Cs1              | -175.4 (2)   | C34 | C26 | C27 | C28              | 171.6 (7)  |
| O8 <sup>3</sup>  | Np2 | O4  | Cs2              | 40.98 (16)   | C34 | C29 | C30 | C31              | -1.2 (11)  |
| O8 <sup>3</sup>  | Np2 | O4  | Cs2 <sup>2</sup> | -63.24 (19)  | C36 | N1  | C35 | Cs2 <sup>7</sup> | -54.4 (15) |

|                 |     |     |                  |            |     |    |     |                  |             |
|-----------------|-----|-----|------------------|------------|-----|----|-----|------------------|-------------|
| O8              | C2  | C11 | Cs1 <sup>4</sup> | -125.7 (6) | C36 | N1 | C35 | O13              | 0.7 (17)    |
| O8              | C2  | C11 | C12              | 161.2 (7)  | C37 | N1 | C35 | Cs2 <sup>7</sup> | 130.4 (9)   |
| O8              | C2  | C11 | C16              | -19.0 (10) | C37 | N1 | C35 | O13              | -174.5 (10) |
| O9 <sup>9</sup> | Np1 | O1  | Np2 <sup>1</sup> | 128.5 (3)  |     |    |     |                  |             |

<sup>1</sup>1-X,2-Y,-Z; <sup>2</sup>2-X,2-Y,-Z; <sup>3</sup>1-X,1-Y,1-Z; <sup>4</sup>+X,-1+Y,1+Z; <sup>5</sup>+X,+Y,1+Z; <sup>6</sup>-1+X,+Y,1+Z; <sup>7</sup>-1+X,+Y,+Z; <sup>8</sup>1-X,1-Y,-Z; <sup>9</sup>+X,+Y,-1+Z

**Table S5.** Parameters of pores and cavities in NpCs-TCPB MOF.

| Parameter                                  | Result   | Unit                            |
|--------------------------------------------|----------|---------------------------------|
| System Volume                              | 2278.445 | Å <sup>3</sup>                  |
| System Mass                                | 2862.999 | g/mol                           |
| System Density                             | 2.087    | g/cm <sup>3</sup>               |
| Total surface area                         | 3.11     | Å <sup>2</sup>                  |
| Total surface area per volume              | 13.66    | m <sup>2</sup> /cm <sup>3</sup> |
| Total surface area per mass                | 6.55     | m <sup>2</sup> /g               |
| Network-accessible surface area            | 0.00     | Å <sup>2</sup>                  |
| Network-accessible surface area per volume | 0.00     | m <sup>2</sup> /cm <sup>3</sup> |
| Network-accessible surface area per mass   | 0.00     | m <sup>2</sup> /g               |
| Total helium volume                        | 451.382  | Å <sup>3</sup>                  |
| Total helium volume                        | 0.095    | cm <sup>3</sup> /g              |
| Total geometric volume                     | 901.931  | Å <sup>3</sup>                  |
| Total geometric volume                     | 0.190    | cm <sup>3</sup> /g              |
| Network-accessible helium volume           | 451.382  | Å <sup>3</sup>                  |
| Network-accessible helium volume           | 0.095    | cm <sup>3</sup> /g              |
| Network-accessible geometric volume        | 901.360  | Å <sup>3</sup>                  |
| Network-accessible geometric volume        | 0.190    | cm <sup>3</sup> /g              |
| Pore limiting diameter                     | 2.69     | Å                               |
| Maximum pore diameter                      | 4.22     | Å                               |
| Number of percolated dimensions            | 1        | -                               |

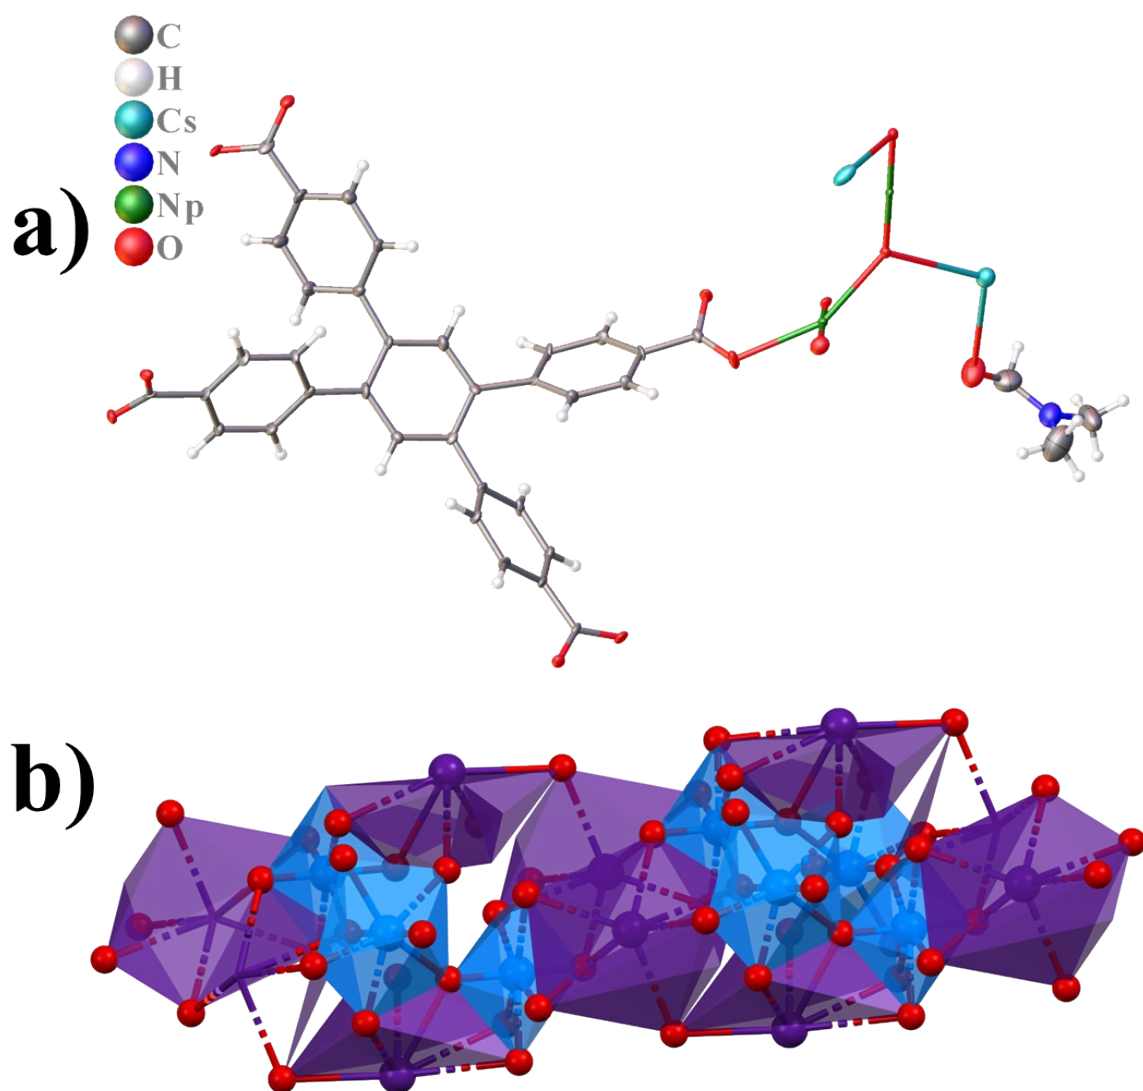

**Figure S1.** a) Asymmetric unit of structure **NpCs-TCPB**; b) coordination polyhedra of neptunium and cesium atoms in **NpCs-TCPB** MOF.

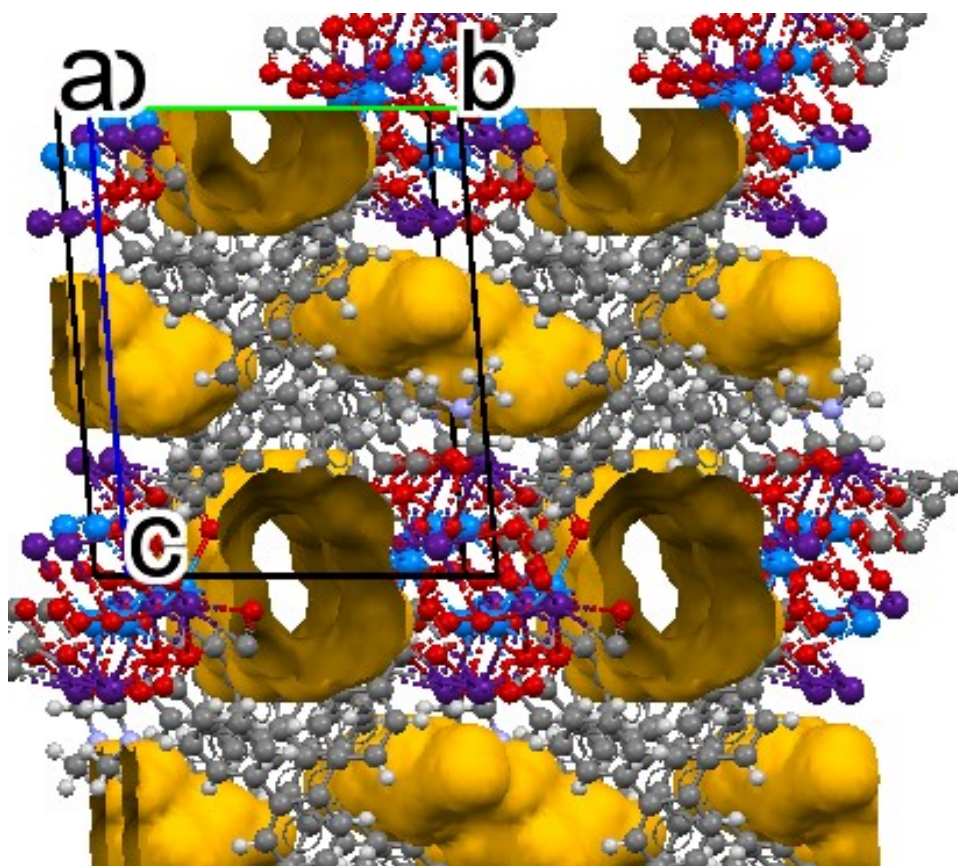

**Figure S2.** View showing the pores in NpCs-TCPB.

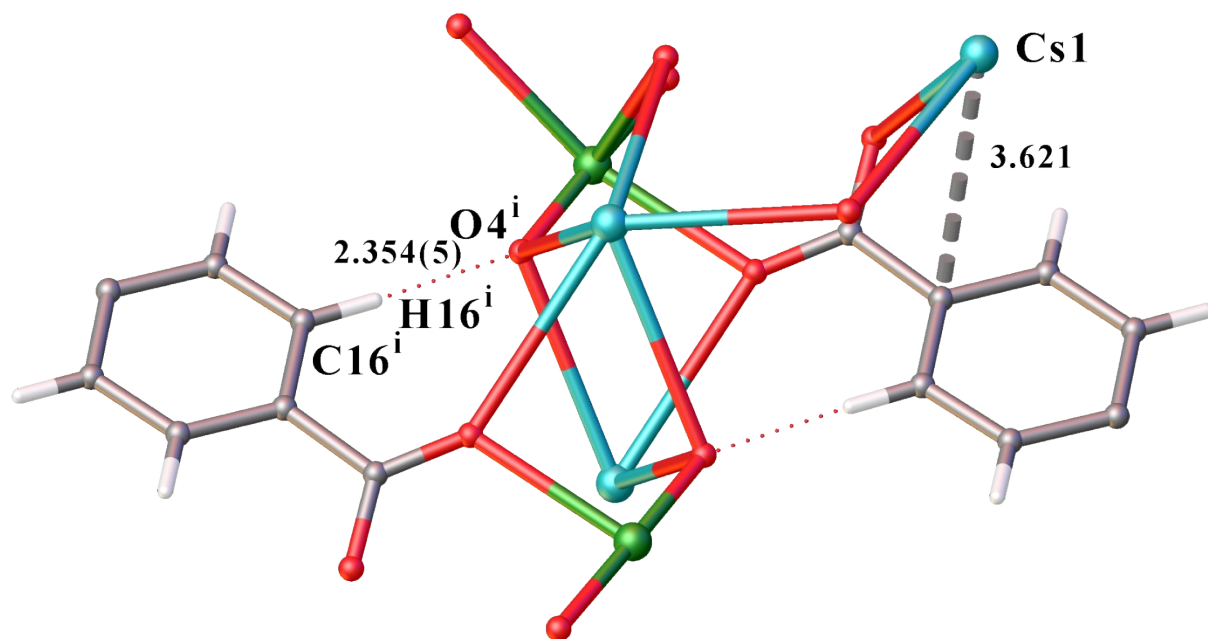

**Figure S3.** View showing cation- $\pi$  interactions and hydrogen bonds in the NpCs-TCPB MOF.

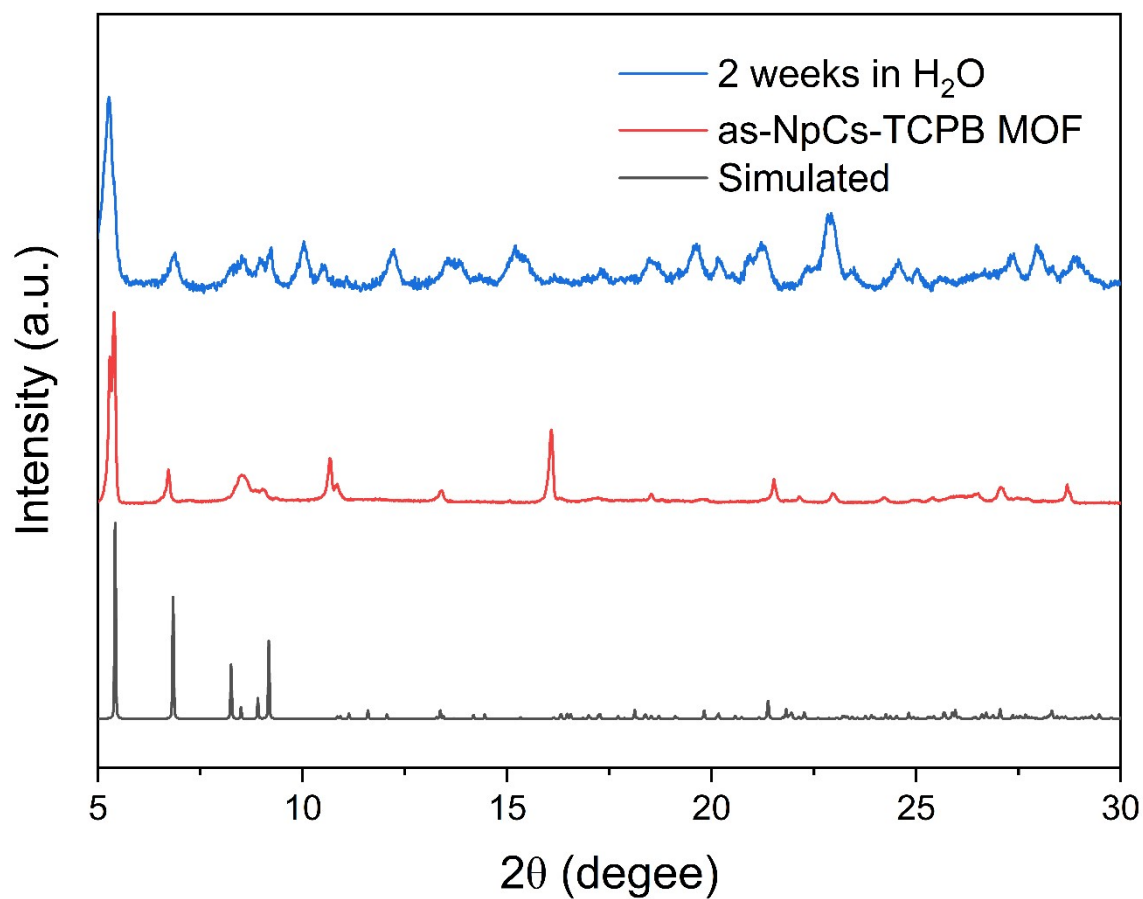

**Figure S4.** Comparison of **NpCs-TCPB** MOF XRD patterns of simulated, as-synthesized and aged in water for 2 weeks.

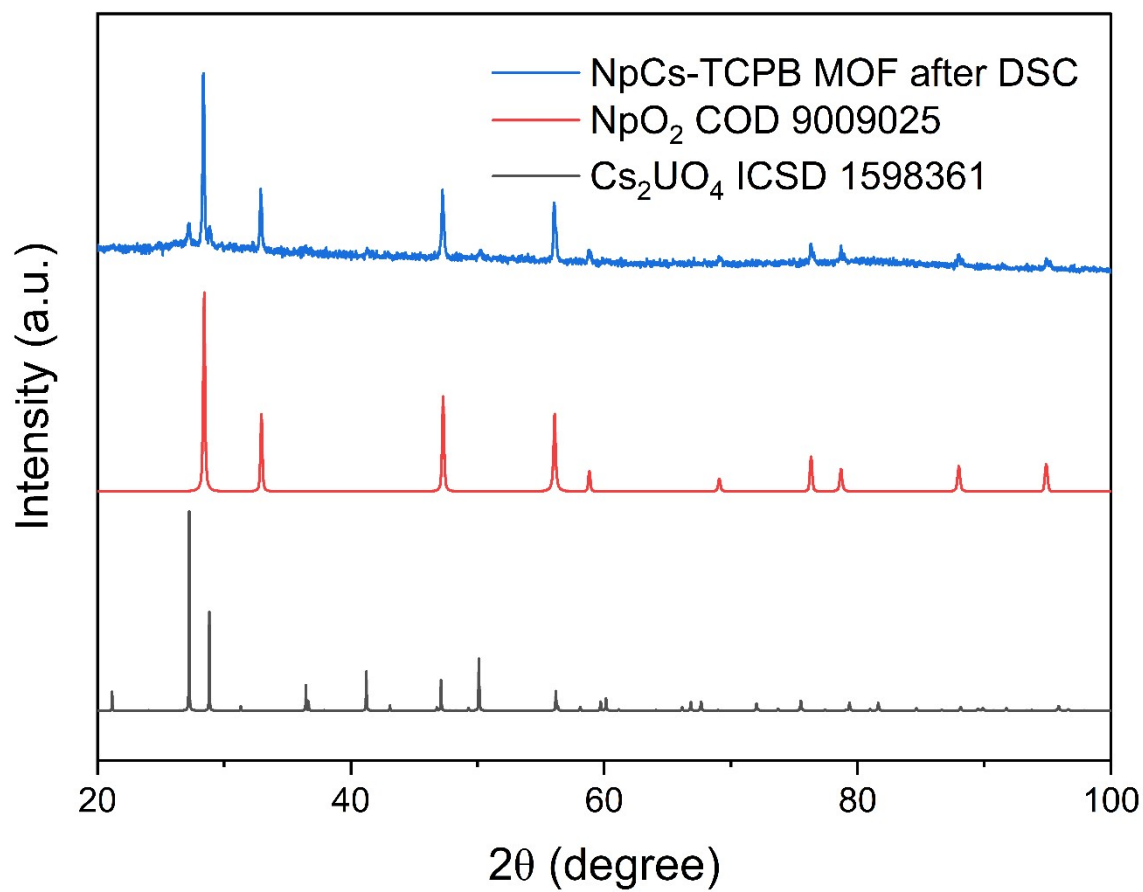

**Figure S5.** XRD patterns of thermolysis products of **NpCs-TCPB MOF**.

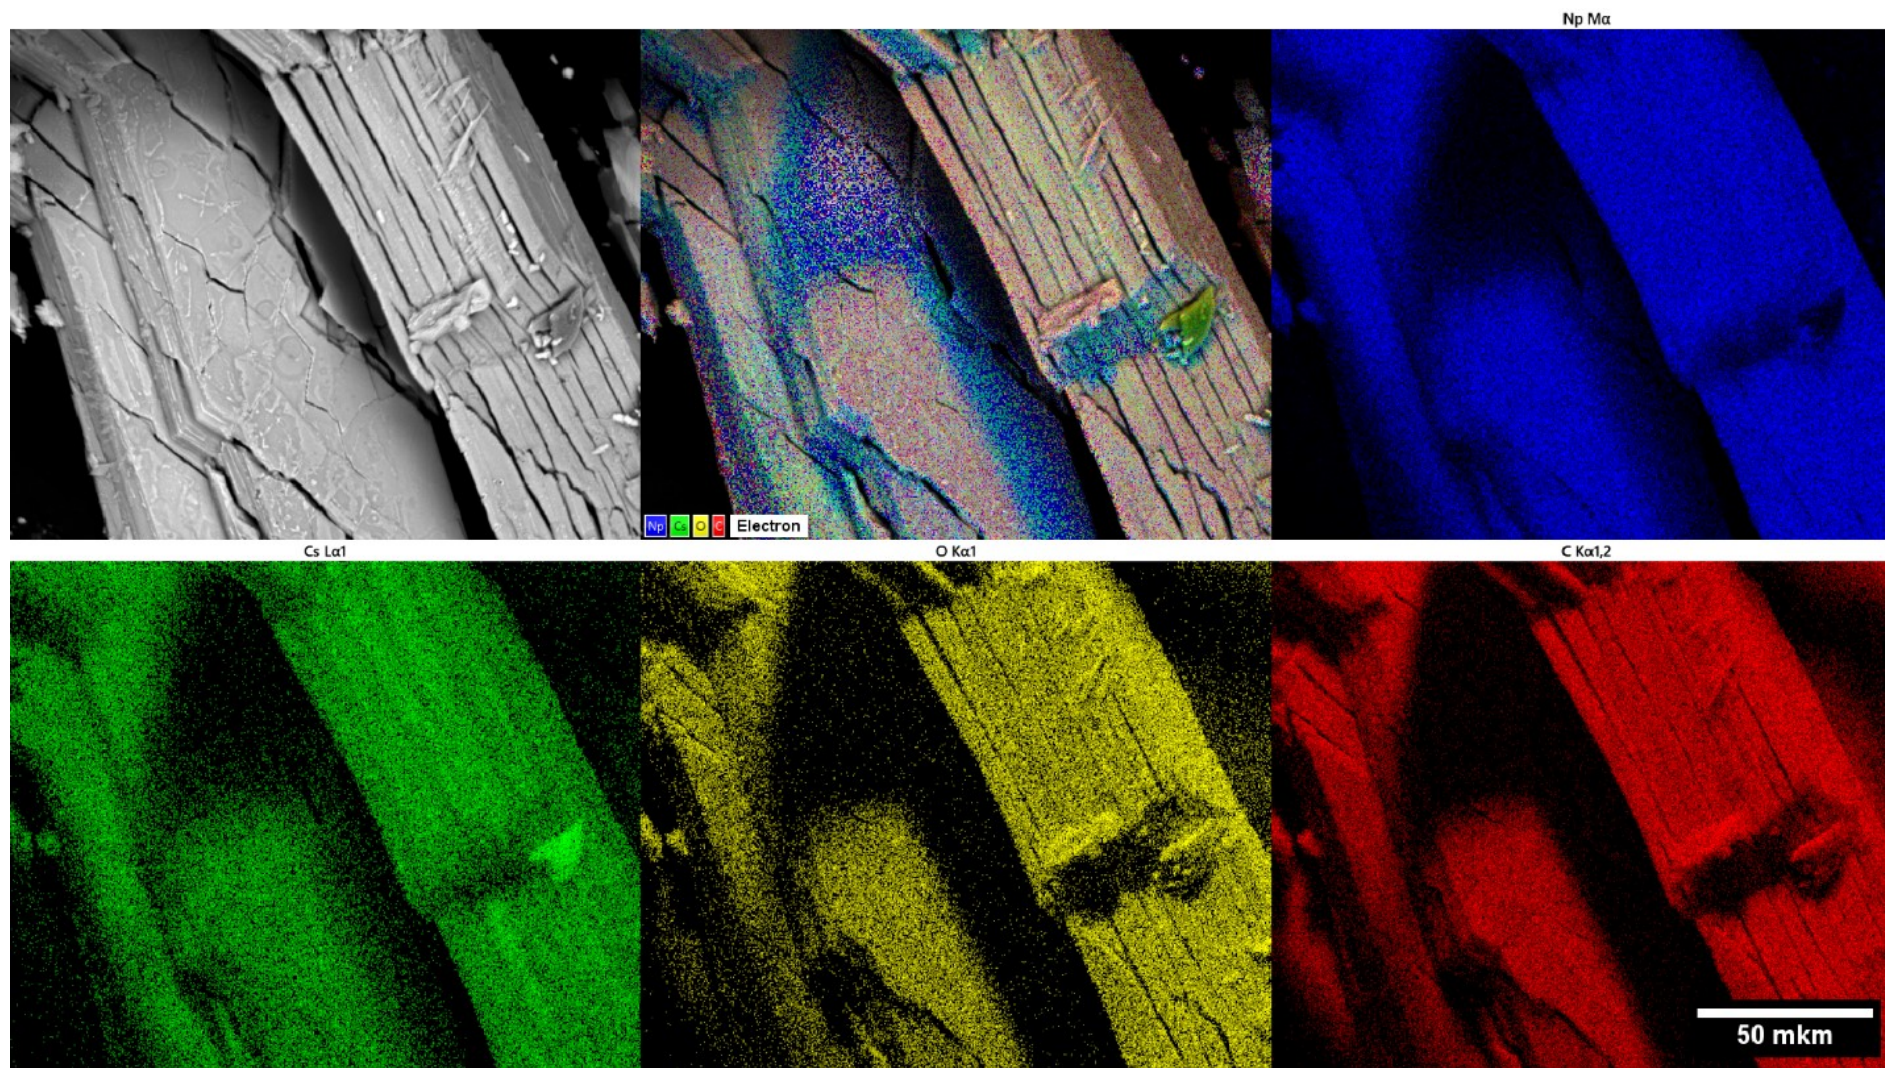

**Figure S6.** BSE SEM image, multilayer elements map, and Np, Cs, O and C distribution of NpCs-TCPB MOF.

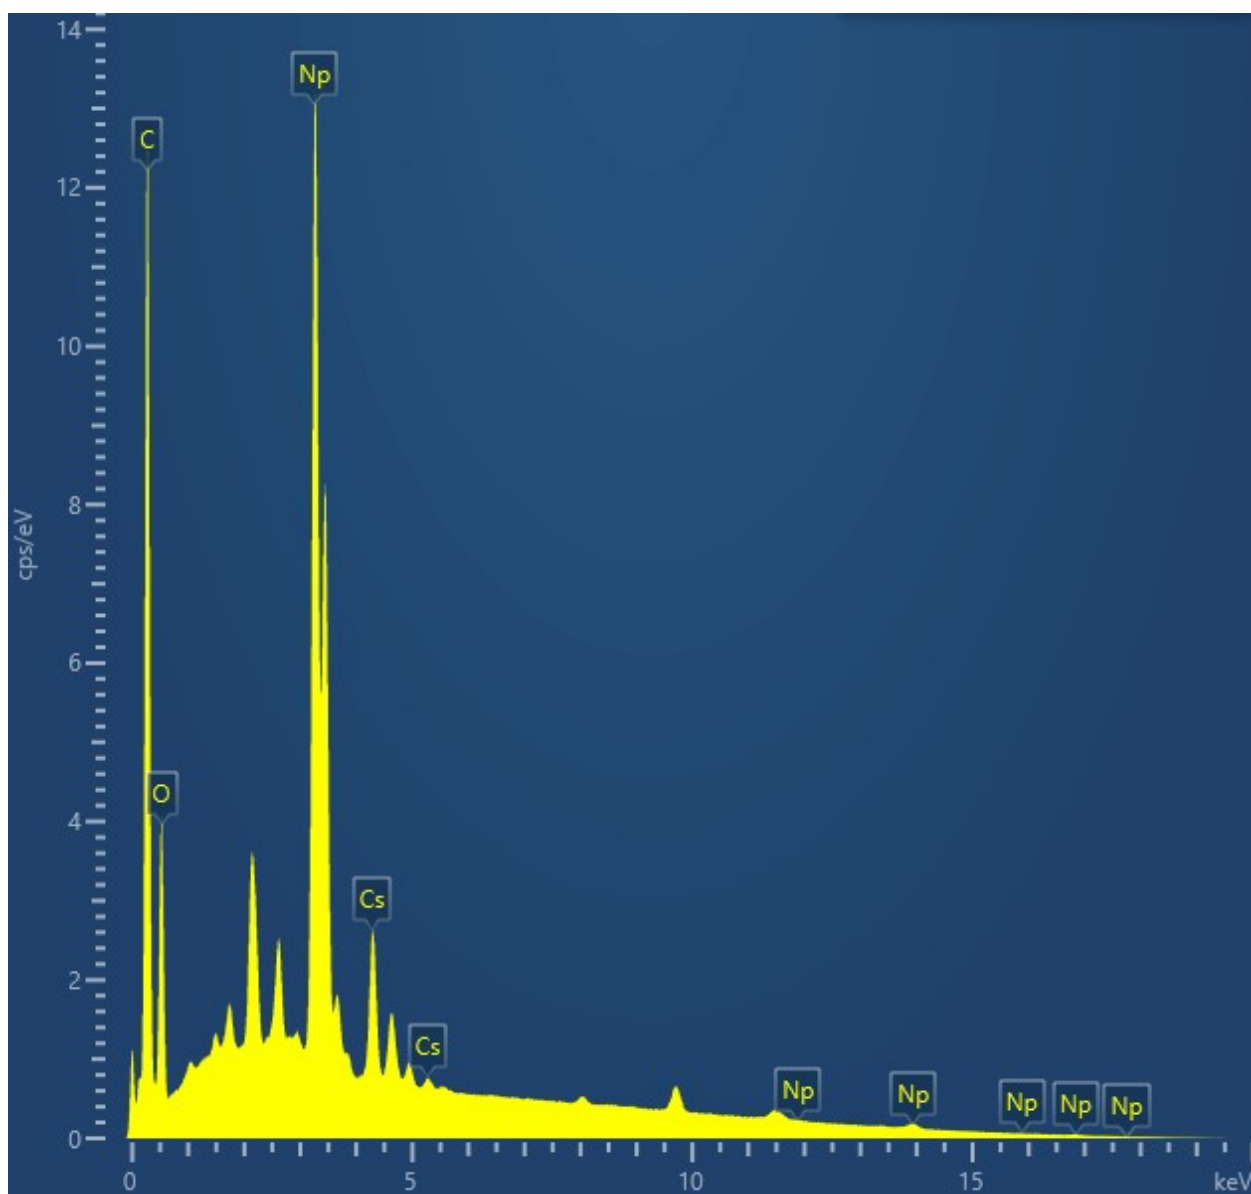

**Figure S7.** EDX spectrum of NpCs-TCPB MOF.

**Table S6.** EDX analysis of **NpCs-TCPB** MOF.

| <b>Element</b> | <b>At.%</b> | <b>Wt%</b> | <b><math>\sigma</math></b> |
|----------------|-------------|------------|----------------------------|
| C              | 73.88       | 38.00      | 0.07                       |
| O              | 20.08       | 13.77      | 0.07                       |
| Np             | 3.10        | 31.49      | 0.06                       |
| Cs             | 2.94        | 16.74      | 0.07                       |

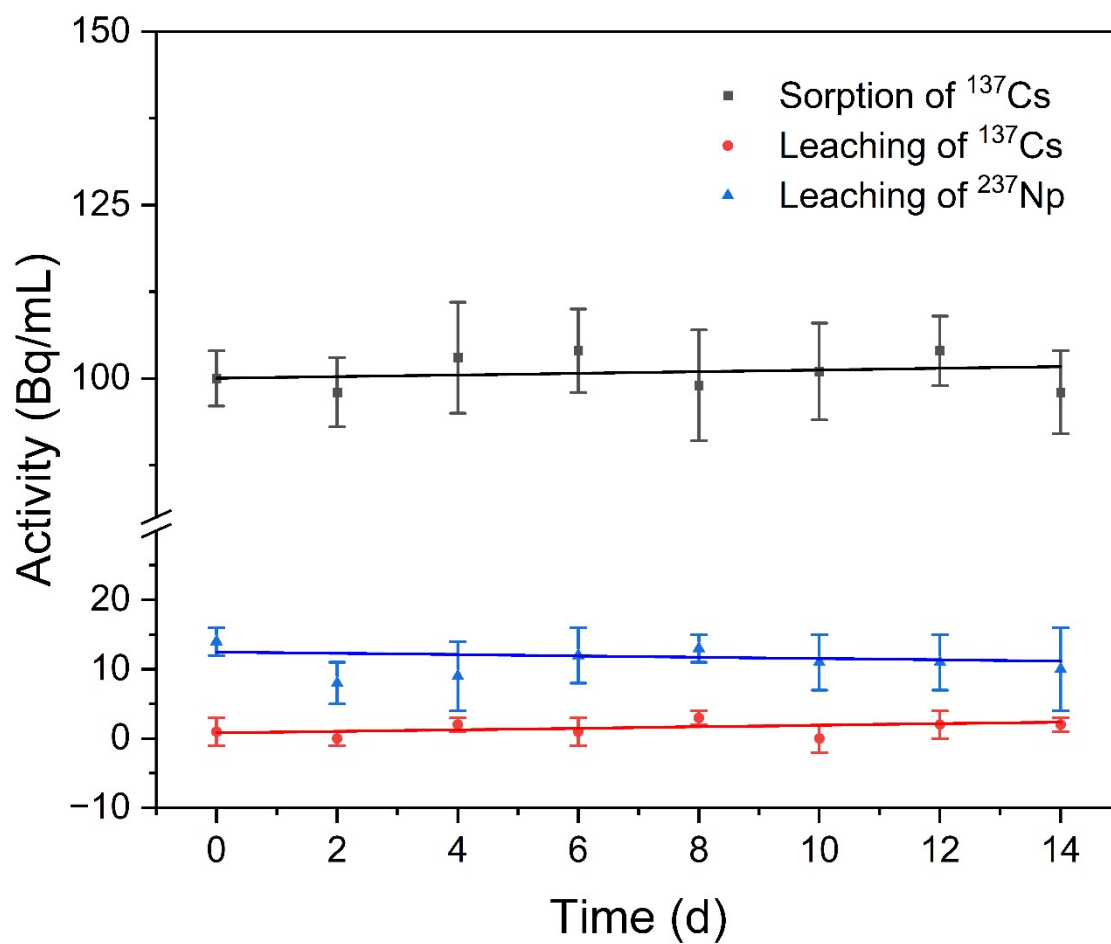

**Figure S8.** Sorption and leaching curves of  $^{137}\text{Cs}$  and  $^{237}\text{Np}$  in water for **NpCs-TCPB** MOF. Instrumental error 5%.

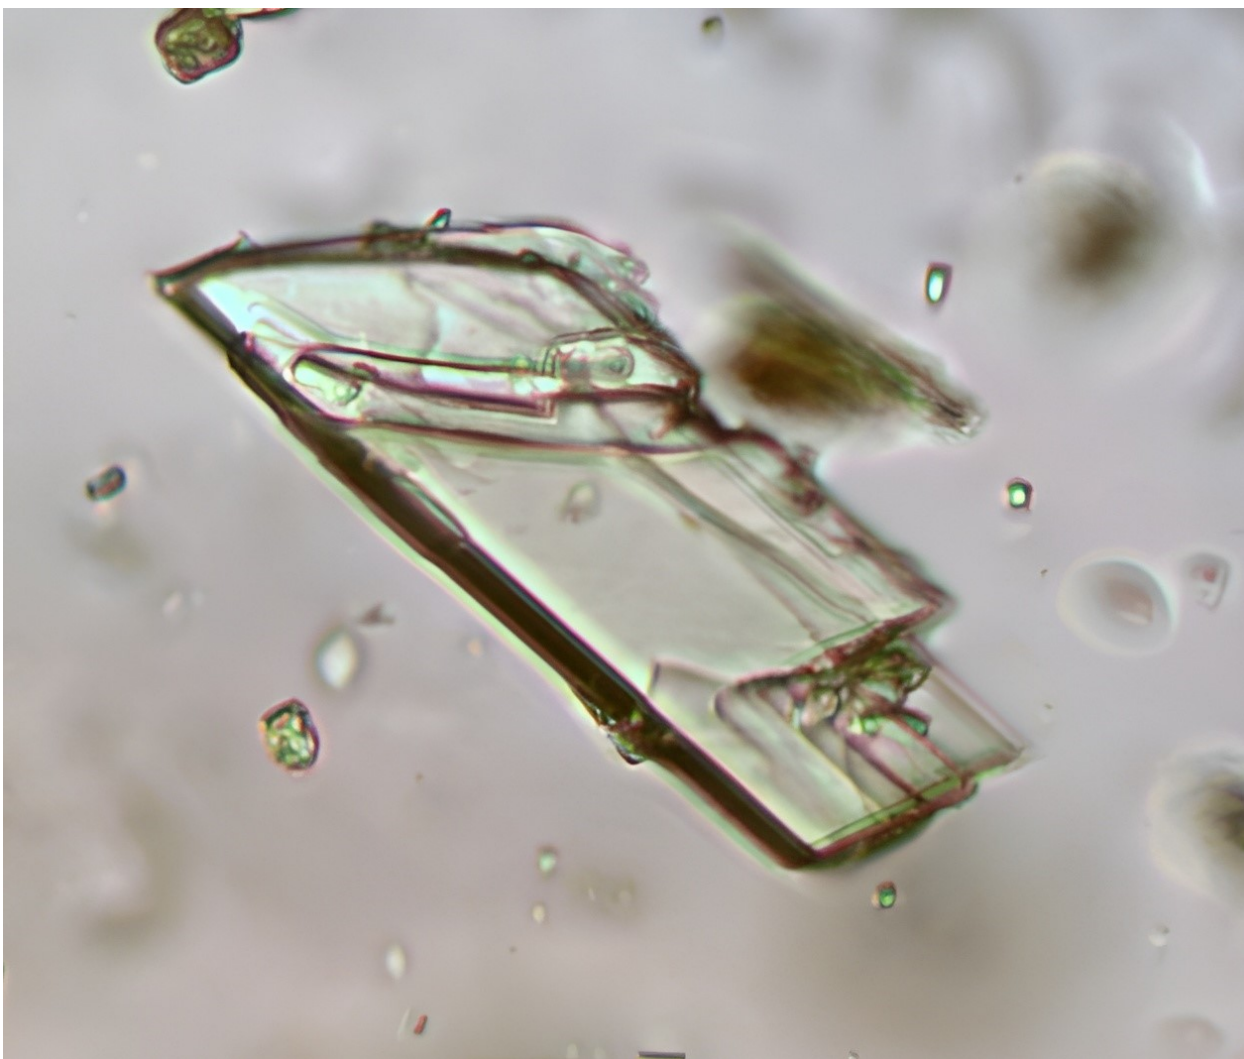

**Figure S9.** Optical photograph of **NpCs-TCPB** MOF crystal.

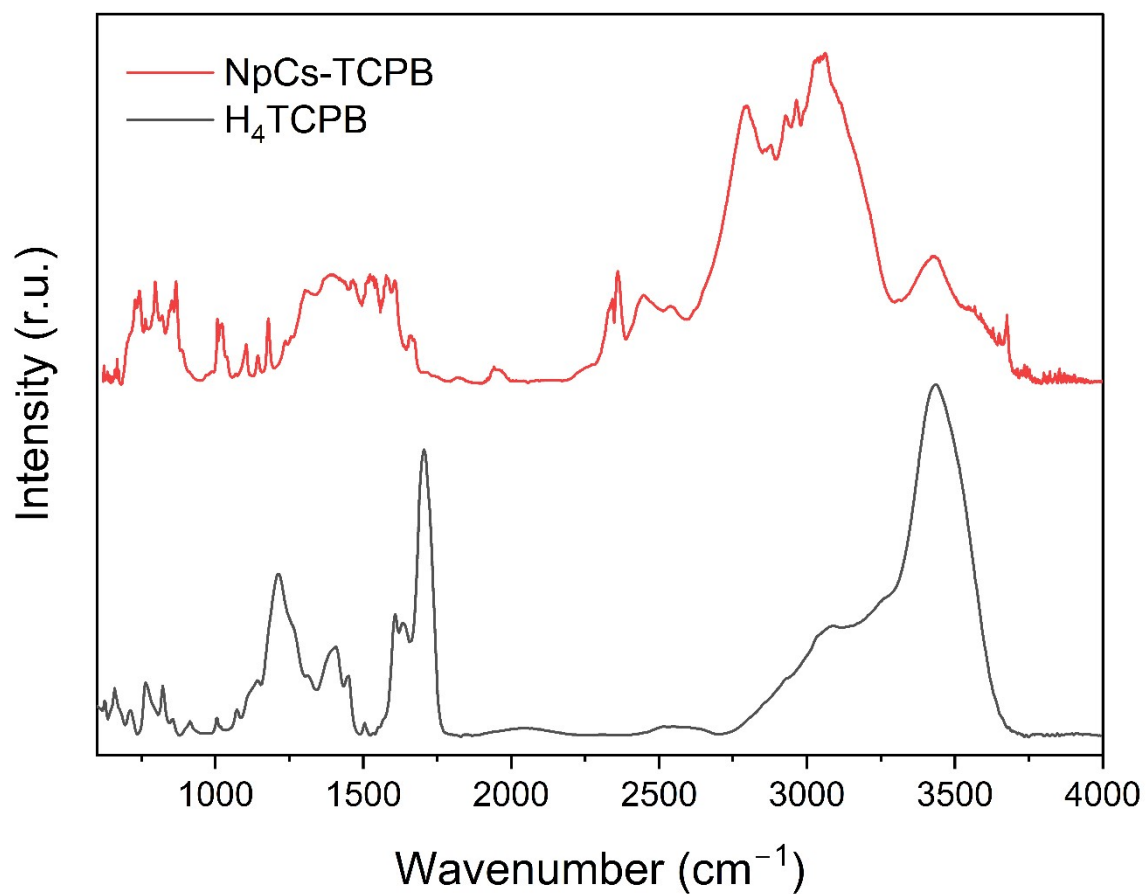

**Figure S10.** IR spectra of **NpCs-TCPB** MOF and H<sub>4</sub>TCPB.

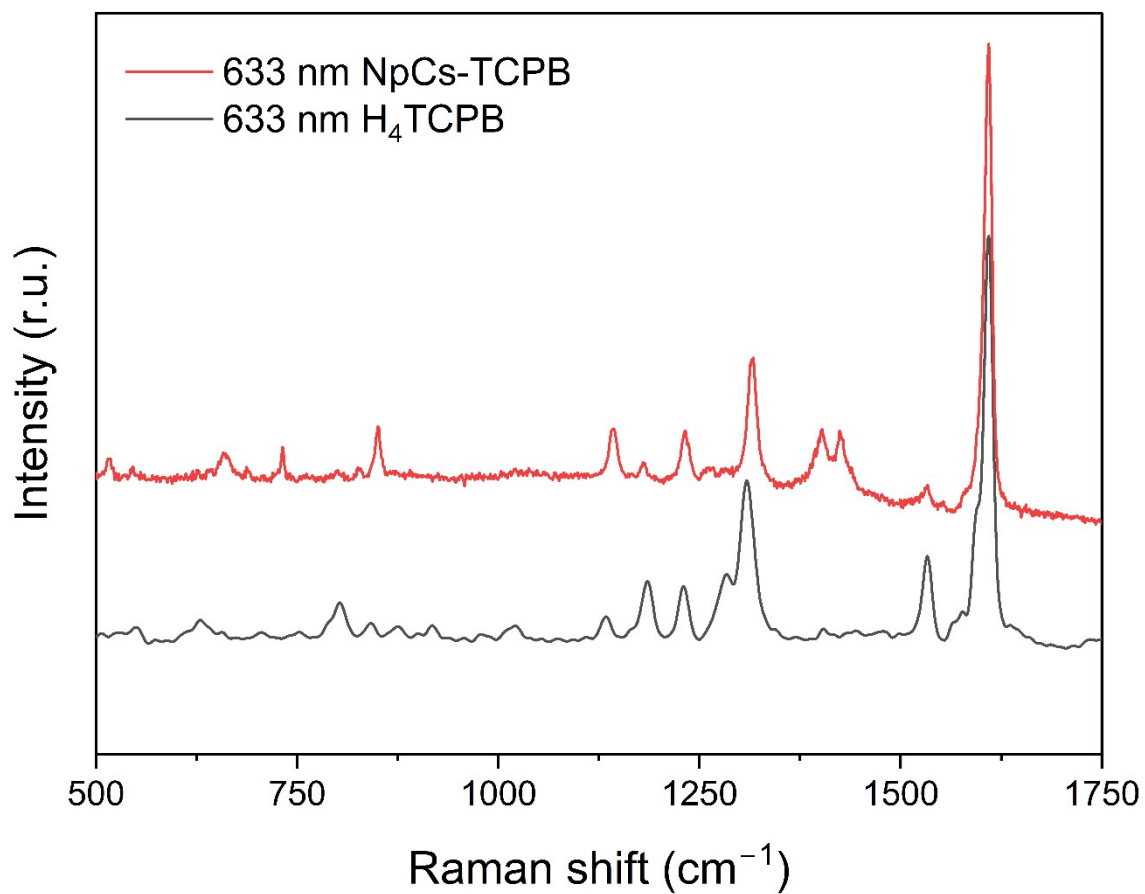

**Figure S11.** Raman spectra of **NpCs-TCPB** MOF and **H<sub>4</sub>TCPB**.

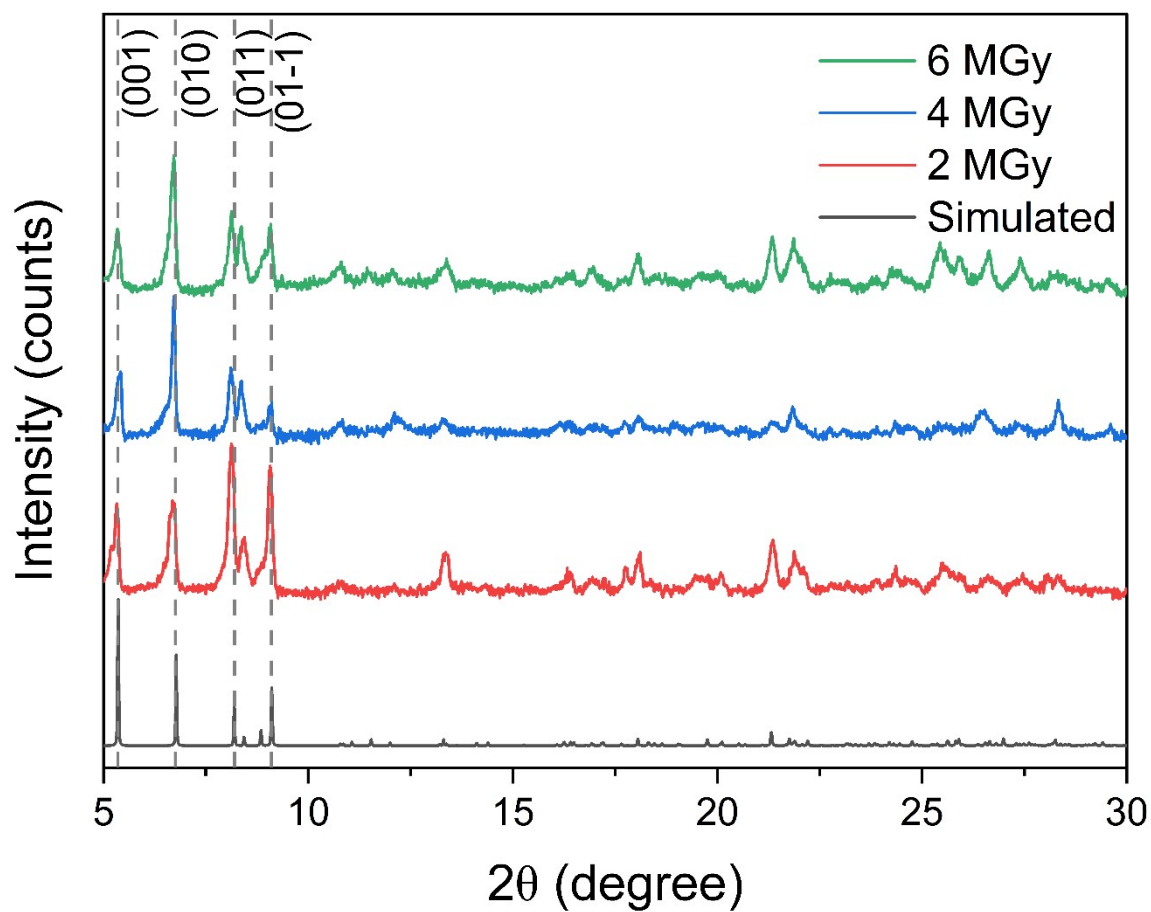

**Figure S12.** pXRD patterns of MOF after irradiated various dose.

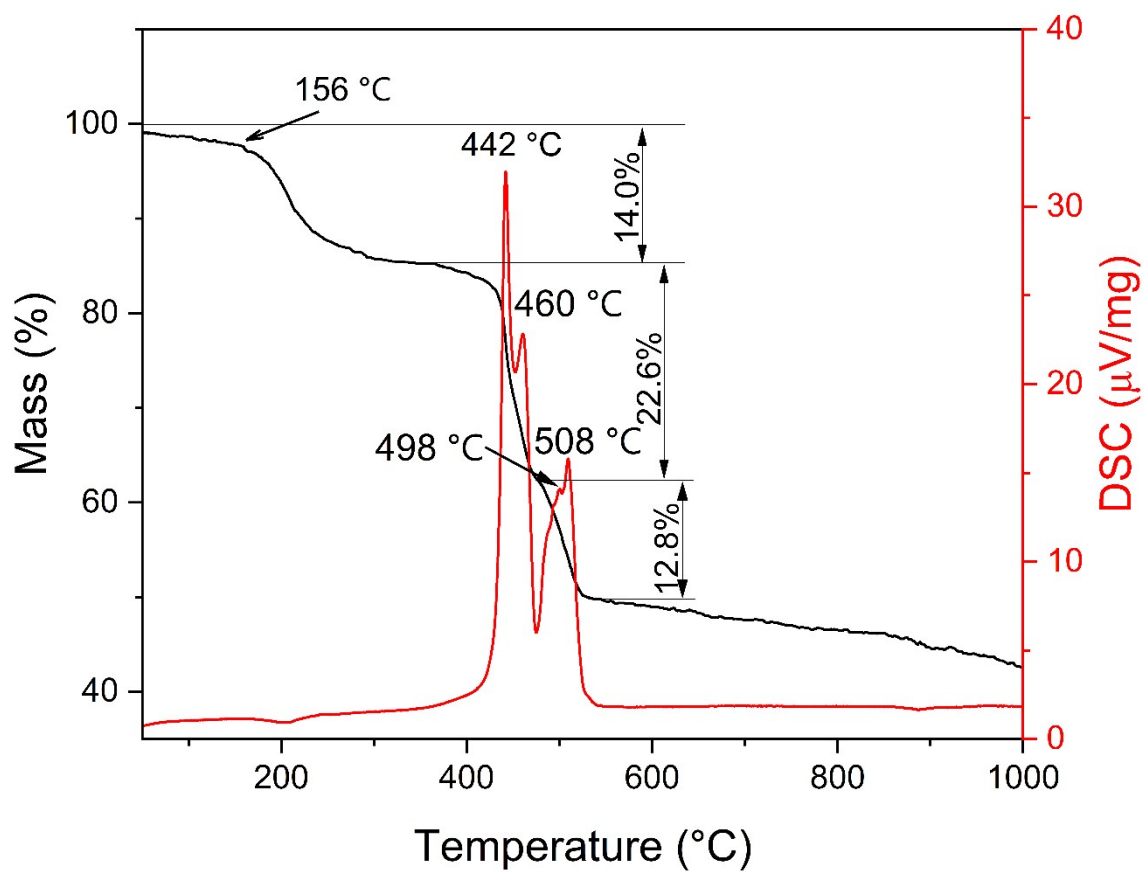

**Figure S13.** TGA and DSC analysis of NpCs-TCPB.

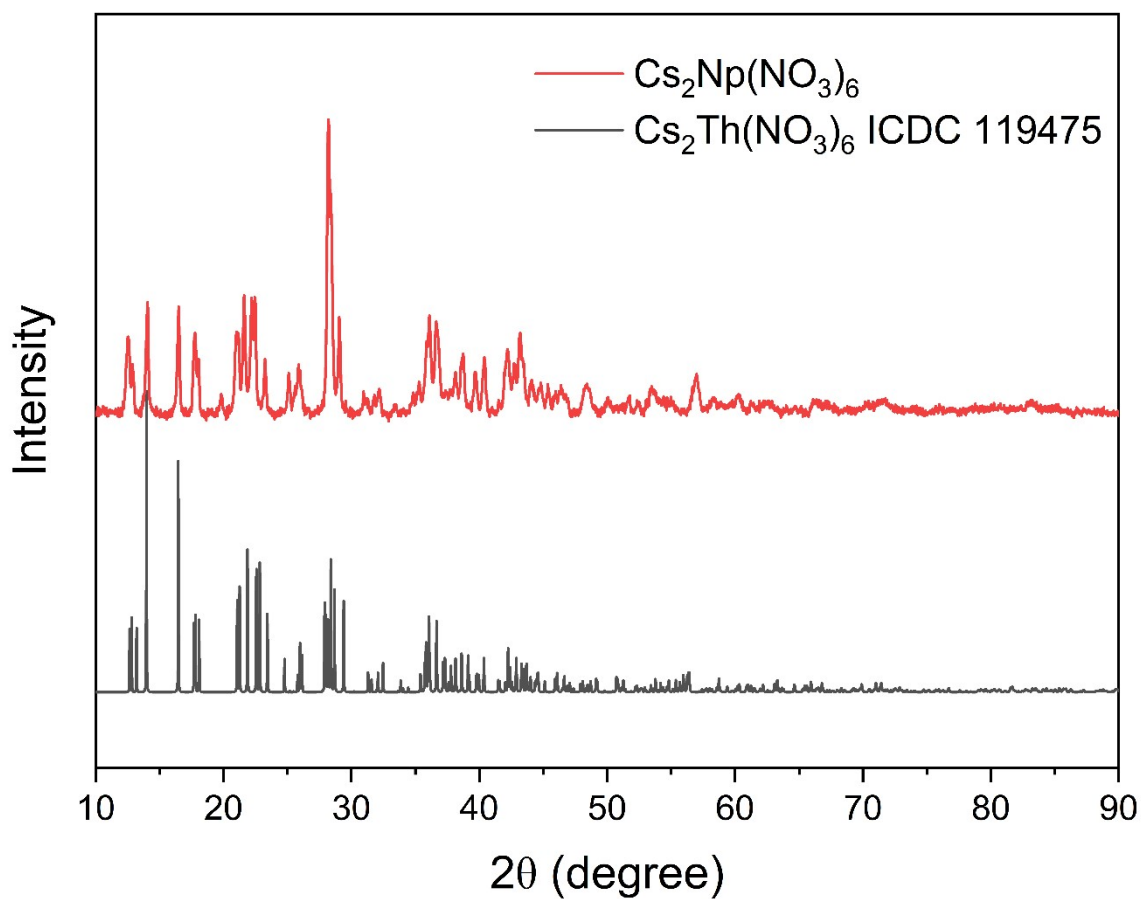

**Figure S14.** Experimental pXRD Cs<sub>2</sub>Np(NO<sub>3</sub>)<sub>6</sub> and simulated patterns for Cs<sub>2</sub>Th(NO<sub>3</sub>)<sub>6</sub>.

**Table S7.** Some properties of known Np consist SBU MOFs

| CCDC, name      | SBU/BU                                                                                                                                      | Pore diameter, limiting/<br>maximum, Å | Radiological<br>stability, MGy | Thermal<br>stability, °C | Ref.      |
|-----------------|---------------------------------------------------------------------------------------------------------------------------------------------|----------------------------------------|--------------------------------|--------------------------|-----------|
| NpCs-TCPB       | 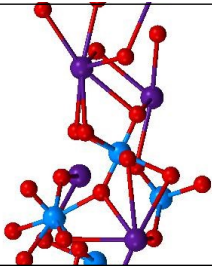                                                           | 2.69/4.22                              | >6                             | 400                      | This work |
| 1509607         | $[(\text{NpO}_2)_{10}(\text{H}_2\text{O})_{14}]^{12+}$<br> | 0.83/2.36                              | n/a                            | n/a                      | [7]       |
| 2103779<br>NSM  | $(\text{NpO}_2)_4$<br>                                   | 6.12/6.60                              | 3                              | 100                      | [8]       |
| 1944580<br>NNS1 | $(\text{NpO}_2)_{18}$                                                                                                                       | 5.19/10.06                             | n/a                            | 200                      | [9]       |
| 1944581<br>NNS2 |                                                                                                                                             | 5.31/10.01                             |                                |                          |           |
|                 |                                                                                                                                             |                                        |                                |                          |           |

|                                                                                                                             |                                                                                                                      |           |     |     |      |
|-----------------------------------------------------------------------------------------------------------------------------|----------------------------------------------------------------------------------------------------------------------|-----------|-----|-----|------|
| NNS3                                                                                                                        | 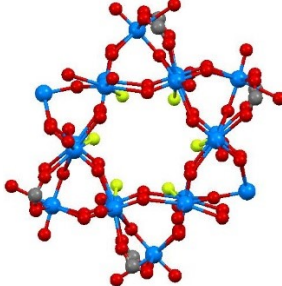                                    |           |     |     |      |
| 1509605<br>[(NpO <sub>2</sub> ) <sub>10</sub> (H <sub>2</sub> O) <sub>14</sub> (Hmel) <sub>2</sub> ]<br>·12H <sub>2</sub> O |                                     | 1.18/2.35 | n/a | n/a | [7]  |
| 2194874<br>Np-1β                                                                                                            | NpO <sub>3</sub> <sup>-</sup><br>  | 0.72/2.04 | n/a | n/a | [10] |
| 2194873<br>Np-1α                                                                                                            |                                    | 0.82/1.64 |     |     |      |
| 1845094<br>NRCP1                                                                                                            | NpO <sub>3</sub> <sup>-</sup><br> | 1.61/3.21 | n/a | n/a | [11] |
| 1837987<br>TRU-MOF1                                                                                                         | NpO <sub>3</sub>                                                                                                     | 1.28/1.81 | n/a | n/a | [12] |

|                            |                                                                                   |     |  |  |  |
|----------------------------|-----------------------------------------------------------------------------------|-----|--|--|--|
|                            | 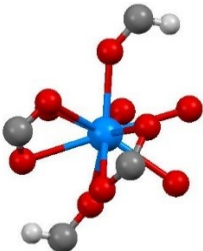 |     |  |  |  |
| 1837814<br><b>TRU-MOF2</b> | $[\text{Np}_6\text{O}_4(\text{OH})_4(\text{H}_2\text{O})_6]^{12+}$                | n/a |  |  |  |
| 1837816<br><b>TRU-MOF3</b> |  |     |  |  |  |

## References

- 1 Bruker AXS Inc., *SAINT, V8.40B*, Madison, WI, USA, 2020.
- 2 L. Krause, R. Herbst-Irmer, G. M. Sheldrick and D. Stalke, *J. Appl. Crystallogr.*, 2015, **48**, 3–10.
- 3 G. M. Sheldrick, *Acta Crystallogr. Sect. A Found. Adv.*, 2015, **71**, 3–8.
- 4 G. M. Sheldrick, *Acta Crystallogr. Sect. C Struct. Chem.*, 2015, **71**, 3–8.
- 5 A. L. Spek, *Acta Crystallogr. Sect. C Struct. Chem.*, 2015, **71**, 9–18.
- 6 C. R. Groom, I. J. Bruno, M. P. Lightfoot and S. C. Ward, *Acta Crystallogr. Sect. B Struct. Sci. Cryst. Eng. Mater.*, 2016, **72**, 171–179.
- 7 N. P. Martin, J. März, C. Volkringer, N. Henry, C. Hennig, A. Ikeda-Ohno and T. Loiseau, *Inorg. Chem.*, 2017, **56**, 2902–2913.
- 8 S. E. Gilson, M. Fairley, S. L. Hanna, J. E. S. Szymanowski, P. Julien, Z. Chen, O. K. Farha, J. A. LaVerne and P. C. Burns, *J. Am. Chem. Soc.*, 2021, **143**, 17354–17359.
- 9 S. E. Gilson, P. Li, J. E. S. Szymanowski, J. White, D. Ray, L. Gagliardi, O. K. Farha and P. C. Burns, *J. Am. Chem. Soc.*, 2019, **141**, 11842–11846.
- 10 N. B. Beck, Z. Bai, J. P. Brannon, D. G. Martinez, D. Grödler, B. N. Long, T. N. Poe, B. M. Rotermund, T. E. Albrecht-Schönzart and J. M. Sperling, *Inorg. Chem.*, 2022, **61**, 17730–17737.
- 11 L. Mei, C. Xu, Q. Wu, K. Hu, L. Yuan, J. Chen, C. Xiao, S. Wang, Z. Chai and W. Shi, *Chem. Commun.*, 2018, **54**, 8645–8648.
- 12 N. P. Martin, J. März, H. Feuchter, S. Duval, P. Roussel, N. Henry, A. Ikeda-Ohno, T. Loiseau and C. Volkringer, *Chem. Commun.*, 2018, **54**, 6979–6982.
